# 1 The analysis of epigenomic evolution

---

2 Arne Sahm<sup>1#</sup>, Philipp Koch<sup>2</sup>, Steve Horvath<sup>3</sup>, Steve Hoffmann<sup>1#</sup>

3 <sup>1</sup> Computational Biology Group, Leibniz Institute on Aging – Fritz Lipmann Institute, Jena, Germany.

4 <sup>2</sup> Core Facility Life Science Computing, Leibniz Institute on Aging – Fritz Lipmann Institute, Jena, Germany.

5 <sup>3</sup> Department of Human Genetics, David Geffen School of Medicine, University of California, Los Angeles, CA 90095, USA.

6 # Corresponding author (email: [arne.sahm@leibniz-fli.de](mailto:arne.sahm@leibniz-fli.de); [steve.hoffmann@leibniz-fli.de](mailto:steve.hoffmann@leibniz-fli.de))

## 7 Abstract

8 While the investigation of the epigenome becomes increasingly important, still little is known about the  
9 long-term evolution of epigenetic marks and systematic investigation strategies are still withstanding.  
10 Here, we systematically demonstrate the transfer of classic phylogenetic methods such as maximum  
11 likelihood based on substitution models, parsimony, and distance-based to interval-scaled epigenetic  
12 data (available at [Github](#)). Using a great apes blood data set, we demonstrate that DNA methylation is  
13 evolutionarily conserved at the level of individual CpGs in promoters, enhancers and genic regions. Our  
14 analysis also reveals that this epigenomic conservation is significantly correlated with its transcription  
15 factor binding density. Binding sites for transcription factors involved in neuron differentiation and  
16 components of AP-1 evolve at a significantly higher rate at methylation than at nucleotide level.  
17 Moreover, our models suggest an accelerated epigenomic evolution at binding sites of BRCA1, CBX2,  
18 and factors of the polycomb repressor 2 complex in humans. For most genomic regions, the  
19 methylation-based reconstruction of phylogenetic trees is at par with sequence-based reconstruction.  
20 Most strikingly, phylogenetic reconstruction using methylation rates in enhancer regions was ineffective  
21 independently of the chosen model. We identify a set of phylogenetically uninformative CpG sites  
22 enriching in enhancers controlling immune-related genes.

## 23 **Introduction**

24 Sequence based methods for phylogenetic tree reconstruction developed more than half a century ago  
25 (Sokal and Michener 1958; Fitch and Margoliash 1967; Jukes and Cantor 1969; Fitch 1971), have laid the  
26 methodological foundation for much of the progress in evolutionary genetics. In addition to determining  
27 sequences of speciation events, they have allowed to associated genotypes with phenotypes and to  
28 investigate critical selection pressures (Pennacchio, et al. 2006; Kosiol, et al. 2008; Ge, et al. 2013; Gaya-  
29 Vidal and Alba 2014; Roux, et al. 2014; Reichwald, et al. 2015; Webb, et al. 2015; Sahm, et al. 2018; Cui,  
30 et al. 2019).

31 It becomes increasingly clear that the heritable information does not solely consist of the sequence of  
32 the four nucleobases adenine, cytosine, guanine and thymine (Boffelli and Martin 2012; Burggren 2016;  
33 Yi 2017; Lind and Spagopoulou 2018). While the functional analysis of chemical DNA modifications and  
34 its associated proteins is gaining pace, little is known about the long-term evolution and conservation of  
35 epigenomic signals. Among the most important of these epigenetic modifications are DNA methylation  
36 and post-translational modifications of histones (Chen, et al. 2017; Michalak, et al. 2019). DNA  
37 methylation marks, for instance, are copied to newly synthesized DNA strands by DNA methylation  
38 transferases targeted to the replication foci (Leonhardt, et al. 1992; Vertino, et al. 2002; Kar, et al. 2012).  
39 Importantly, epigenetic information may not only be passed on from cell to cell in the soma, but also  
40 through the germline from generation to generation (Verhoeven, et al. 2016; Perez and Lehner 2019).

41 However, it is not necessary to invoke these findings to take an interest at phylogenetic information  
42 conveyed by the epigenome. The evolution of epigenomic readers and writers themselves ultimately  
43 affects their function and changes in the epigenomic landscape may thus be understood as a  
44 consequence of this very process. While it is clear that the presence or absence of epigenetic marks in  
45 principle has a major influence on gene expression and cell identity, it is still largely open which marks

46 have which functional significance where in the genome (Barrero, et al. 2010; Kim and Costello 2017;  
47 Xia, et al. 2020). As in many other examples (Bergmiller, et al. 2012; Luo, et al. 2015; Arun, et al. 2016), it  
48 is plausible that the degree of conservation would be a strong indicator for functional relevance.  
49 Furthermore, it could contribute to the elucidation of the molecular causes of phenotypic difference. To  
50 date, comparatively few studies have compared the epigenome of different species, e.g. to identify  
51 pairwise differentially methylated regions (Molaro, et al. 2011; Zeng, et al. 2012; Mendizabal, et al.  
52 2016; Böck, et al. 2018)). To learn more about the long-term evolution of epigenomic marks, it appears  
53 necessary to develop new models allowing systematic evolutionary analyses - as is the case at the  
54 genetic level (Xiao, et al. 2014; Lowdon, et al. 2016). Obviously, the central question is whether the  
55 evolutionary information of individual marks is sufficient to allow meaningful analyses. Thus, it remains  
56 to be established which epigenomic marks are conserved well enough over longer evolutionary  
57 distances to allow the reconstruction of phylogenetic relationships.

58 That correct tree topologies can in principle be reconstructed from methylation data was shown by  
59 Martin et al. using blood samples from several primate species and a simple distance based tree method  
60 to reconstruct a single tree from the methylome (Martin, et al. 2011). Also, Qu et. al, whose main focus  
61 was on hypomethylated regions however, reconstructed a single tree from the whole methylome using  
62 a broader species set and a sophisticated time-continuous Markov chain model (Qu, et al. 2018). Their  
63 results indicated faster epigenomic evolution in rodent than in primate sperm. The work of Hernando-  
64 Herraes et al. was mainly concerned with differentially methylated regions resulting from pairwise  
65 comparisons, but also demonstrated, using a simple hierarchical clustering approach and great apes  
66 blood data, that genomic regions that showed incomplete lineage sorting on the nucleotide level  
67 recapitulated this on methylation level.

68 Building on these results, we systematically investigate different models of epigenomic evolution to  
69 facilitate insights into functions of single genes or pathways. Specifically, we transfer tree reconstruction  
70 such as Maximum Parsimony, Maximum Likelihood (based on substitution models), and distance-based  
71 methods to the level of DNA methylation. Subsequently, models are applied to simulated data as well as  
72 a publicly available real data to analyze their ability to reconstruct correct phylogenetic trees based on  
73 DNA methylation information. Substitution models arguably promise the greatest potential regarding  
74 functionally relevant analyses such as positive selection or accelerated epigenetic evolution in  
75 comparison to the genetic level. To this end, we are evaluating different evolutionary scenarios for  
76 different genomic features (e.g. enhancers, gene bodies).

## 77 **Materials and methods**

### 78 **Real data set**

79 To test the developed methods, we used publicly available whole-genome bisulfite sequencing data  
80 from blood samples of four primate species: *Homo sapiens* (hereafter, human), *Pan troglodytes*  
81 (chimpanzee), *Gorilla gorilla* (gorilla) and *Pongo abelii* (orangutan) (PRJNA286277,(Hernando-Herraez, et  
82 al. 2015)). The data set consisted of 286 to 324 million read pairs per species. With a length of 90 base  
83 pairs per read this amounts to 17-fold to 25-fold genome coverage, assuming a genome size of 3 giga  
84 base pairs per species (Table S1). Fig. S1 summarizes the processing of the real data, details are given in  
85 the supplementary material.

### 86 **Identification of orthologous defined regions and annotations**

87 Our study distinguishes between four classes of genomic regions (Fig. 1A). The gene body class,  
88 reflecting the translated part of the genome, is differentiated from regulatory regions embedded in  
89 enhancer and two promoter-related regions reflecting potential differences in selection pressures of

90 methylation in coding and non-coding sequences. Specifically, we consider promoter-near regions 2000  
 91 base pairs upstream and downstream the translation initiation site (TIS), respectively. In practice, the  
 92 2000-Up-TIS class covers the promoter and untranslated regions. Coordinates of the translation  
 93 initiation and end sites of the human protein-coding genes ( $n=19,374$ ) were obtained from the Uniprot  
 94 track of the *University of California, Santa Cruz* (UCSC) table browser for the genome version hg38  
 95 (Karolchik, et al. 2004). Coordinates of enhancers were obtained from UCSCs geneHancer track retaining  
 96 only “double elite” enhancers with known interactions ( $n=25,572$ ). Coordinates were of 9,679 genes and  
 97 20,327 enhancers were successfully translated to the three non-human primates using the UCSC liftover  
 98 tool (Kent, et al. 2010). For practical reasons, analysis was restricted to elements with a maximum length  
 99 of 100,000/50,000 base pairs, respectively (Fig. 1A). For functional analyses, the UCSC hg38  
 100 *Transcription Factor ChIP-seq Clusters* track, aggregating transcription factor binding sites (TFBS) from  
 101 more than 1,200 experiments in human samples for 340 transcription factors (TF) were incorporated  
 102 into this study.

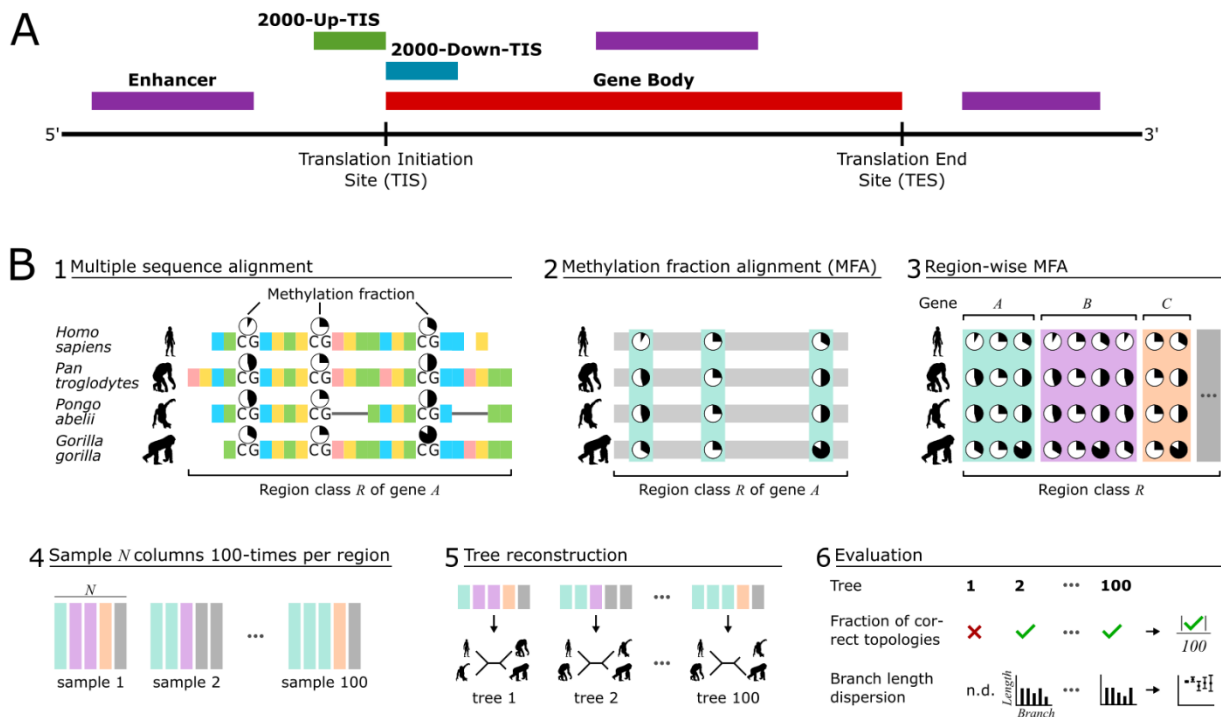

104 **Fig. 1.** A) Classes of genomic regions examined in this work. The region classes were defined using the Uniprot annotation of all  
105 human protein-coding genes (2000-Up-TIS, 2000-Down-TIS, Gene body, n=19,374) or geneHancer annotation (Enhancer,  
106 n=25,572). The corresponding genome regions in chimpanzee, gorilla, and orangutan were acquired based on a genome  
107 alignment strategy. B) Workflow and evaluation strategy. i) For each region defined in A) of each gene a multiple sequence  
108 alignment of the four species studied in this work was created and the methylation fractions measured from blood samples  
109 mapped to the alignment. ii) From this, the methylation fraction alignment (MFA) was extracted. iii) We merged these gene-  
110 wise alignments to region-wise alignments. iv) From the region-wise methylation fraction alignments, we sampled 100 times  $N$   
111 columns. v) From each of the 100 drawings, we reconstructed a phylogenetic tree. vi) As evaluation criteria, we used, on the  
112 one hand, the proportion of trees that correspond to the known great ape topology. On the other hand, we quantified the  
113 dispersions of the branch lengths. The procedure from iv) to vi) was performed for different values of  $N$  to consider the  
114 evaluation criteria as a function of the amount of input data.

## 115 CpG alignment

116 For each region instance, the respective four orthologous sequences were aligned using Clustalw2,  
117 version 2.0.10 (Larkin, et al. 2007). Since the alignment of effectively non-homologous bases in poorly  
118 conserved regions may lead to false phylogenetic inference (Jordan and Goldman 2012), we used trimAl,  
119 version v1.4.rev15 with the parameter “-strictplus” removing unreliable alignment columns (Capella-  
120 Gutiérrez, et al. 2009). In addition, only those alignments were considered for further analysis for which  
121 at least 25 evaluable CpGs remained. The methylation fractions previously determined in the individual  
122 species were then mapped to the CpGs of the alignment using the known coordinates. This led to  
123 methylation fraction alignments (MFA), forming the empirical data basis of this work (Fig. 1A).

## 124 Evaluation strategy

125 The quality of individual tree reconstruction methods under different parametrizations was measured  
126 with increasing input sizes using two benchmarks: (i) the ability to correctly reconstruct the known  
127 primate tree topology and (ii) the degree of dispersion of the determined branch lengths. For these  
128 purposes, all methylation alignments of a region class were first concatenated (pooling). From this pool,  
129  $N$  alignment columns were drawn for each combination of the used tree reconstruction approaches (see  
130 below) and  $N \in \{100, 200, \dots, 1000, 2000, \dots, 10000\}$ . The procedure was repeated 100 times.  
131 Subsequently, it was determined how many of the 100 repetitions led to the correct tree topology (Fig.  
132 1B). To measure dispersion in terms of standard deviation of branch lengths from the mean length, the

133 correct topology was fixed. Briefly, we expect to observe that the proportion of correct topologies  
 134 should increase with increasing  $N$  and the dispersion of branch lengths should decrease.

## 135 Tree reconstruction methods

136 We used three main strategies to reconstruct phylogenetic trees from the aligned methylation fractions:  
 137 (i) Markov process based maximum likelihood, (ii) parsimony, and (ii) a distance-based methods. Here,  
 138 we particularly focused on maximum likelihood and investigated different models, parameterizations,  
 139 and assumptions based on this method. For simplicity, one combination is termed *default method* in the  
 140 further and all alternative methods and parametrizations are compared against it. Fig. 2 summarizes the  
 141 different tree reconstruction methods used. The developed methods for tree reconstruction from  
 142 methylation (or more generally interval scaled) data were implemented in R and are available on [Github](#).

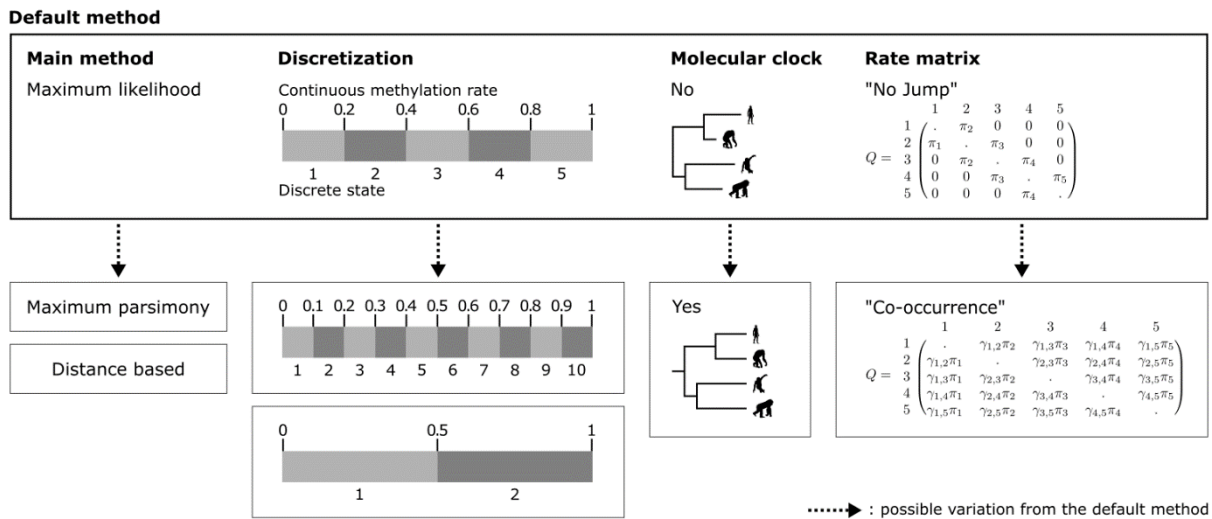

143

144 **Fig. 2.** Applied tree reconstruction methods. Most of the analyses in this work were performed with a maximum likelihood tree  
 145 reconstruction method based on a Markov model of the evolution of methylation fractions. The model is based on a  
 146 discretization of the floating-point methylation fractions into 5 states. No molecular clock is assumed. The design of the  
 147 transition rate matrix  $Q$  assumes that a methylation fraction status cannot evolve into a non-adjacent status within short time  
 148 spans (*No Jump Model*). This means that when the methylation fraction changes from a state A to a non-adjacent state B during  
 149 evolution, all states between A and B have been passed through. The combination of the tree reconstruction method and the  
 150 described model properties is called the *default method* in the context of this work for simplification. To better assess the  
 151 effects of the assumptions of the default method, we compared this method with variations of itself: different number of  
 152 states, molecular clock or a transition rate matrix that allows the direct change to distant states. In addition, we have also  
 153 applied two tree reconstruction methods that differ fundamentally from maximum likelihood. For this, either evolutionary

154 distances based on the model of the default method were determined and then neighbor joining was applied or a parsimony  
155 approach was used.

## 156 **Maximum likelihood**

157 We propose substitution models for the analysis of DNA methylation fractions analogous to the  
158 frequently used continuous-time Markov process models at nucleotide (e.g. (Jukes and Cantor 1969;  
159 Kimura 1980; Hasegawa, et al. 1985)), codon (e.g. (Goldman and Yang 1994)) and amino acid (e.g.  
160 (Kishino, et al. 1990)) level. In contrast to nucleotides, codons, and amino acids measured on a nominal  
161 scale, methylation fractions are measured on an interval scale. To address this difference, we introduce  
162 a discretization function

$$163 \quad d: [0,1] \rightarrow \{1, \dots, n\}$$

164 with  $n \in \mathbb{N}$  being the number of model methylation states and  $\forall x > y: d(x) \geq d(y)$ .

165 Let a model  $M$  be defined by the pair  $M = (\pi, Q)$  consisting of an initial (and equilibrium) distribution  
166  $\pi \in [0,1]^n$  and an  $n \times n$  transition probability rate matrix  $Q = (Q_{s,t})$  with  $1 \leq s \neq t \leq n$ . As usual, the  
167 transition probability matrix  $P(\tau)$  for a given branch length  $\tau$  is determined by numerically finding a  
168 solution to

$$169 \quad P(\tau) = e^{Q*\tau}$$

170 The likelihood of a given phylogenetic tree can then be determined by Felsenstein's method assuming  
171 independent evolution of CpG sites (Felsenstein 1981). Branch lengths of a given tree topology are  
172 estimated by maximizing the likelihood and the optimal topology is that with the highest likelihood. For  
173 likelihood maximization we use an optimized version of the *Broyden-Fletcher-Goldfarb-Shanno* method  
174 (Broyden 1970; Byrd, et al. 1995).

175 In this paper, we propose two flavors of evolutionary models that we call *No Jump Model* and *Co-*  
176 *occurrence Model*. The No Jump Model assumes that the methylation fractions change smoothly during



177 evolution, i.e. within short time intervals the methylation state of a CpG site can only change to one of  
 178 the neighboring states (see Fig. 2). In contrast, the Co-occurrence Model also allows transitions to  
 179 distant states in short time intervals. Here, the transition probabilities between two states are made  
 180 dependent on how often these two states could be observed empirically within an alignment column.

181 To formally define these models, let  $X = (X_{i,j})$  be a given  $k \times l$  matrix with the rows corresponding to  $k$   
 182 homologous CpG-sites, the columns corresponding to  $l$  indices of the examined species and each entry  
 183  $X_{i,j} \in [0,1]$  being the measured methylation fraction of the  $i^{\text{th}}$  CpG-site in the species with the index  
 184  $j; 1 \leq i \leq k, 1 \leq j \leq l$ . Here,  $X$  will either be drawn from real data, i.e. the concatenated alignments of  
 185 a region class, or from simulated data (see below).

186 Subsequently, the number of each methylation state  $s$  in each species  $a$  is counted using the function  
 187  $o_a: \{1, \dots, n\} \rightarrow \mathbb{N}_0$  with  $1 \leq a \leq l$

$$188 \quad o_a(s) = \sum_{r=1}^k \delta_{s,d(X_{r,a})}$$

189 with  $\delta_{p,q}$  being the Kronecker delta  $\delta_{p,q} = \begin{cases} 0 & \text{if } p \neq q \\ 1 & \text{if } p = q \end{cases}$

190 Based on this, we define the equilibrium frequency  $\pi = (\pi_s)$  for both, the No Jump and the Co-  
 191 occurrence Model as

$$192 \quad \pi_s = \frac{\sum_{a=1}^l o_a(s)}{\sum_{u=1}^n \sum_{a=1}^l o_a(u)}$$

193 Accordingly, for the No Jump Model, we define  $Q = (Q_{s,t})$  as

$$194 \quad Q_{s,t} = \begin{cases} 0 & \text{if } |s - t| > 1 \\ \pi_t & \text{else} \end{cases}$$

195 with  $1 \leq s \neq t \leq n$ . For the Co-occurrence Model, the number of co-occurrences of all combinations of  
 196 methylation states  $s$  and  $t$  and species  $a$  and  $b$  is counted using a function  $co_{a,b}: \{1, \dots, n\}^2 \rightarrow$   
 197  $\mathbb{N}_0$  with  $1 \leq a \leq l, 1 \leq b \leq l, a \neq b$

$$198 \quad co_{a,b}(s, t) = \sum_{r=1}^k (\delta_{s,d(X_{r,a})} * \delta_{t,d(X_{r,b})} + \delta_{t,d(X_{r,a})} * \delta_{s,d(X_{r,b})})$$

199 Let,  $\gamma_{s,t} = \gamma_{t,s} = \frac{\sum_{a=1}^{l-1} \sum_{b=a+1}^l co_{a,b}(s,t)}{\sum_{u=1}^{n-1} \sum_{v=u+1}^n \sum_{a=1}^{l-1} \sum_{b=a+1}^l co_{a,b}(u,v)}$  be the fraction observed co-occurrences of the states  $s$   
 200 and  $t$  across the alignment.

201 Finally, we define  $Q = (Q_{s,t})$  for the Co-occurrence Model as

$$202 \quad Q_{s,t} = \gamma_{s,t} * \pi_t$$

203 with  $1 \leq s \neq t \leq n$ . As usual, for both models  $Q_{s,s}$  are fixed such that

$$204 \quad Q_{s,s} = - \sum_{t \neq s} Q_{s,t}$$

205 For this study, we tested the models with different parameters and technical settings. Detailed  
 206 parametrizations for the No Jump and Co-occurrence models are shown in Figures S2 and S3.  
 207 Specifically, we tested models with different state numbers  $n$ , and we used the models both with and  
 208 without the assumption of a molecular clock.

## 209 **Maximum Parsimony**

210 The basic idea of Fitch's Maximum Parsimony algorithm (Fitch 1971) is to find a set of sequence states at  
 211 the inner nodes minimizing the number of necessary changes along the edges of the tree. We adapted  
 212 the algorithm to work on the interval scale. Figures S4-S6 illustrates the differences between the  
 213 algorithm and our modification.

214 In the bottom-up post-order tree traversal, an interval  $I(m)$  is assigned to each node  $m$ . Leaves are  
215 initialized with

$$216 \quad I(l) = [\text{observed number at } l, \text{observed number at } l]$$

217 Then, for each inner node  $m$  with children  $x$  and  $y$ ,  $I(m)$  is determined by

$$218 \quad I(m) = \begin{cases} I(x) \cap I(y), & \text{if } I(x) \cap I(y) \neq \emptyset \\ [\min(\max(I(x)), \max(I(y))), \max(\min(I(x)), \min(I(y)))] & \text{else} \end{cases}$$

219

220 In the top-down pre-order tree traversal, each node  $m$  is assigned a number  $i(m) \in I(m)$ . For the root  
221  $r$ ,  $i(r)$  is chosen as an arbitrary number within  $I(r)$ ; for all other inner nodes with parent node state  $p$

$$222 \quad i(m) = \begin{cases} p, & \text{if } p \in I(m) \\ \arg \min_{x \in I(m)} |p - x|, & \text{else} \end{cases}$$

223 As with the original algorithm, the optimal tree topology is the one that explains the sequence  
224 alignment with the lowest number of necessary changes overall.

### 225 **Distance-based methods**

226 Distance matrices were determined based on the *No Jump Model* described above. Each distance matrix  
227  $T = (T_{a,b})$  with  $1 \leq a \leq l$ ,  $1 \leq b \leq l$  was determined by maximizing the likelihood for the pairwise  
228 distances in the usual way

$$229 \quad T_{a,b} = T_{b,a} = \arg \max_{\tau \in \mathbb{R}^{k+}} \prod_{1 \leq i \leq k} (\pi_{x_{i,a}} * P_{a,b}(\tau))$$

230 for  $a \neq b$ ; and  $T_{a,a} = 0$  for  $1 \leq a \leq l$ . For each distance matrix  $T$  the corresponding phylogenetic tree  
231 was reconstructed using the Neighbor Joining algorithm (Saitou and Nei 1987).

## 232 **Simulations**

233 Artificial alignments were generated based on the known tree topology and divergence times of the  
234 great apes (Locke, et al. 2011). For each artificial alignment column, the tree was traversed in pre-order.  
235 For each node  $m$ , a state was drawn from  $(1, \dots, n)$  using a probability vector  $\varphi(m)$ . For the root  $r$ ,  $\varphi(r)$   
236 was set to the equilibrium distribution  $\varphi(r) = \pi$ . For every other node  $m$  with the incoming edge  $e$  with  
237 length  $\tau_e$  and the parent node in state  $s$ ,  $\varphi(m)$  was set to the  $s$ -th row of the matrix  $P(\tau_e)$  (Fig. S7). The  
238 simulated alignment column then results from the states assigned to the leaves of this tree. This  
239 simulation approach has been widely used at nucleotide and codon level, e.g.(Rambaut and Grassly  
240 1997; Yang 1997; Fletcher and Yang 2009).

241 This general scheme has been extended for the different concrete analyses. For the comparison of real  
242 and simulated data, noise of different orders of magnitude was added to the simulated data. For the  
243 analyses of long-branch attraction and resolution limits for reconstruction depending on the branch  
244 length the tree used for the simulation was changed. (see Supplement methods for details, also for the  
245 analysis of site-specificity that was conducted on real data).

## 246 **Results and Discussion**

247 On nucleotide data, maximum likelihood based Markov models are critical tools for formal testing of  
248 evolutionary hypothesis. This includes the detection of sequences under positive selection on certain  
249 branches of a phylogeny. In order to address such questions in the epigenome, we first focused on the  
250 evaluation of maximum likelihood reconstructions in this work. Specifically, we investigated different  
251 flavours of this methodology. A discretization of CpGs according to their methylation levels is at the  
252 heart of the default method and derivatives thereof. Depending on the methylation, in our models, a  
253 single CpG can assume on of two, five (default method), or ten states.

## 254 **CpG Methylation varies widely between regions but little between species**

255 To test the functionality of the developed methods, we used a public whole-genome bisulfite  
256 sequencing data set generated from blood samples of four great apes: human, chimpanzee, gorilla, and  
257 orangutan (Hernando-Herraez, et al. 2015) as well as to simulated data. On a genome-wide level,  
258 methylation patterns are extremely similar in all species and apparently dominated by the functional  
259 aspects of the four selected classes of regions (see Fig. 1A for region definition): In the gene body, the  
260 distribution of methylation fractions assume a shape resembling a beta distribution with prominent  
261 peaks at both ends of the unit interval. The peak for high to complete methylation rates is substantially  
262 higher than the peak for low to missing methylation (Fig. 3A). As methylation rates in the gene body  
263 positively correlate with gene expression, this observation may be explained with the transcriptional  
264 activity of the genes (Zemach, et al. 2010; Yang, et al. 2014). However, more than a quarter of the CpGs  
265 in the data set still show intermediate methylation between 0.2-0.8. After discretization, these levels  
266 correspond to the three intermediate states in the five-states model of the default method (Fig. 2). The  
267 methylation landscape of gene bodies is characterized by a sharp increase of average CpG methylation  
268 at the 5'-end and remains relatively stable at about 80% from this point on (Fig. 3B). On average, the  
269 gene body shows the highest methylation levels amongst all compared regions, but at the same time  
270 lowest CpG density by far: apart from small areas in vicinity to the 5' and 3' end, it is stable below 0.5%  
271 (Fig. 3B). For comparison: the genome-wide CpG fraction is 1% (Stevens, et al. 2013). The gene body also  
272 shows the lowest pair-wise methylation rate similarity among species (Table 1). Given the above-  
273 mentioned dependency of methylation and expression levels, this finding may reflect individual short-  
274 term expression changes, e.g. in the context of diurnal rhythms. In line with a characteristic  
275 hypomethylation in promotor regions, the distribution in the 2000-Up-TIS class moves towards a  
276 unimodal shape with more than 80% of the CpGs having a methylation content between 0 and 0.2 (Fig.  
277 3A). The few methylated CpGs are predominantly found at the 5' end of this region class (Fig. 3B).

278 Conversely, and in addition to the 2000-Down-TIS also the enhancer class exhibits a bimodal shape.  
279 Here, approximately two thirds of the CpGs are within the range of 0 to 0.2, one sixth between 0.2 to 0.8  
280 and another sixth between 0.8 to 1 (Fig. 3A). The 2000-Down TIS region class shows a strong increase in  
281 methylation on CpGs from the 5' to the 3' end (Fig. 3B) - not surprising given it is, by construction, a  
282 cutout on the left edge of the gene. Enhancers are the only class of regions to exhibit a symmetrical  
283 pattern in terms of methylation percentage and CpG density (Fig. 3B).

284 Expectedly, the average similarity of the methylation fractions varies more between the regions under  
285 consideration than between species pairs – reflecting the distinct functional roles of the regions.  
286 Interspecies similarity ranges from 87.2-90.0% in the gene body to 94.6-95.4% in the 2000-Up-TIS region  
287 (Table 1).

288 To model a null-hypothesis for the analysis of region-specific similarities, we repeatedly uniformly  
289 ( $n=1000$ ) drew random pairs of methylation rates from the class-specific background distributions and  
290 calculated expected differences. Based on this, we found that the level of region-specific similarity  
291 between species pairs is significantly higher than expected ( $p < 10^{-3}$ , Table 1). These initial, descriptive  
292 results suggest that the methylation data contains evolutionarily conserved, phylogenetically analyzable  
293 signals. Despite a high degree of similarity probably dominated by region-specific biological functions,  
294 differences at this rather coarse grained level already reflect the phylogeny of the great apes.

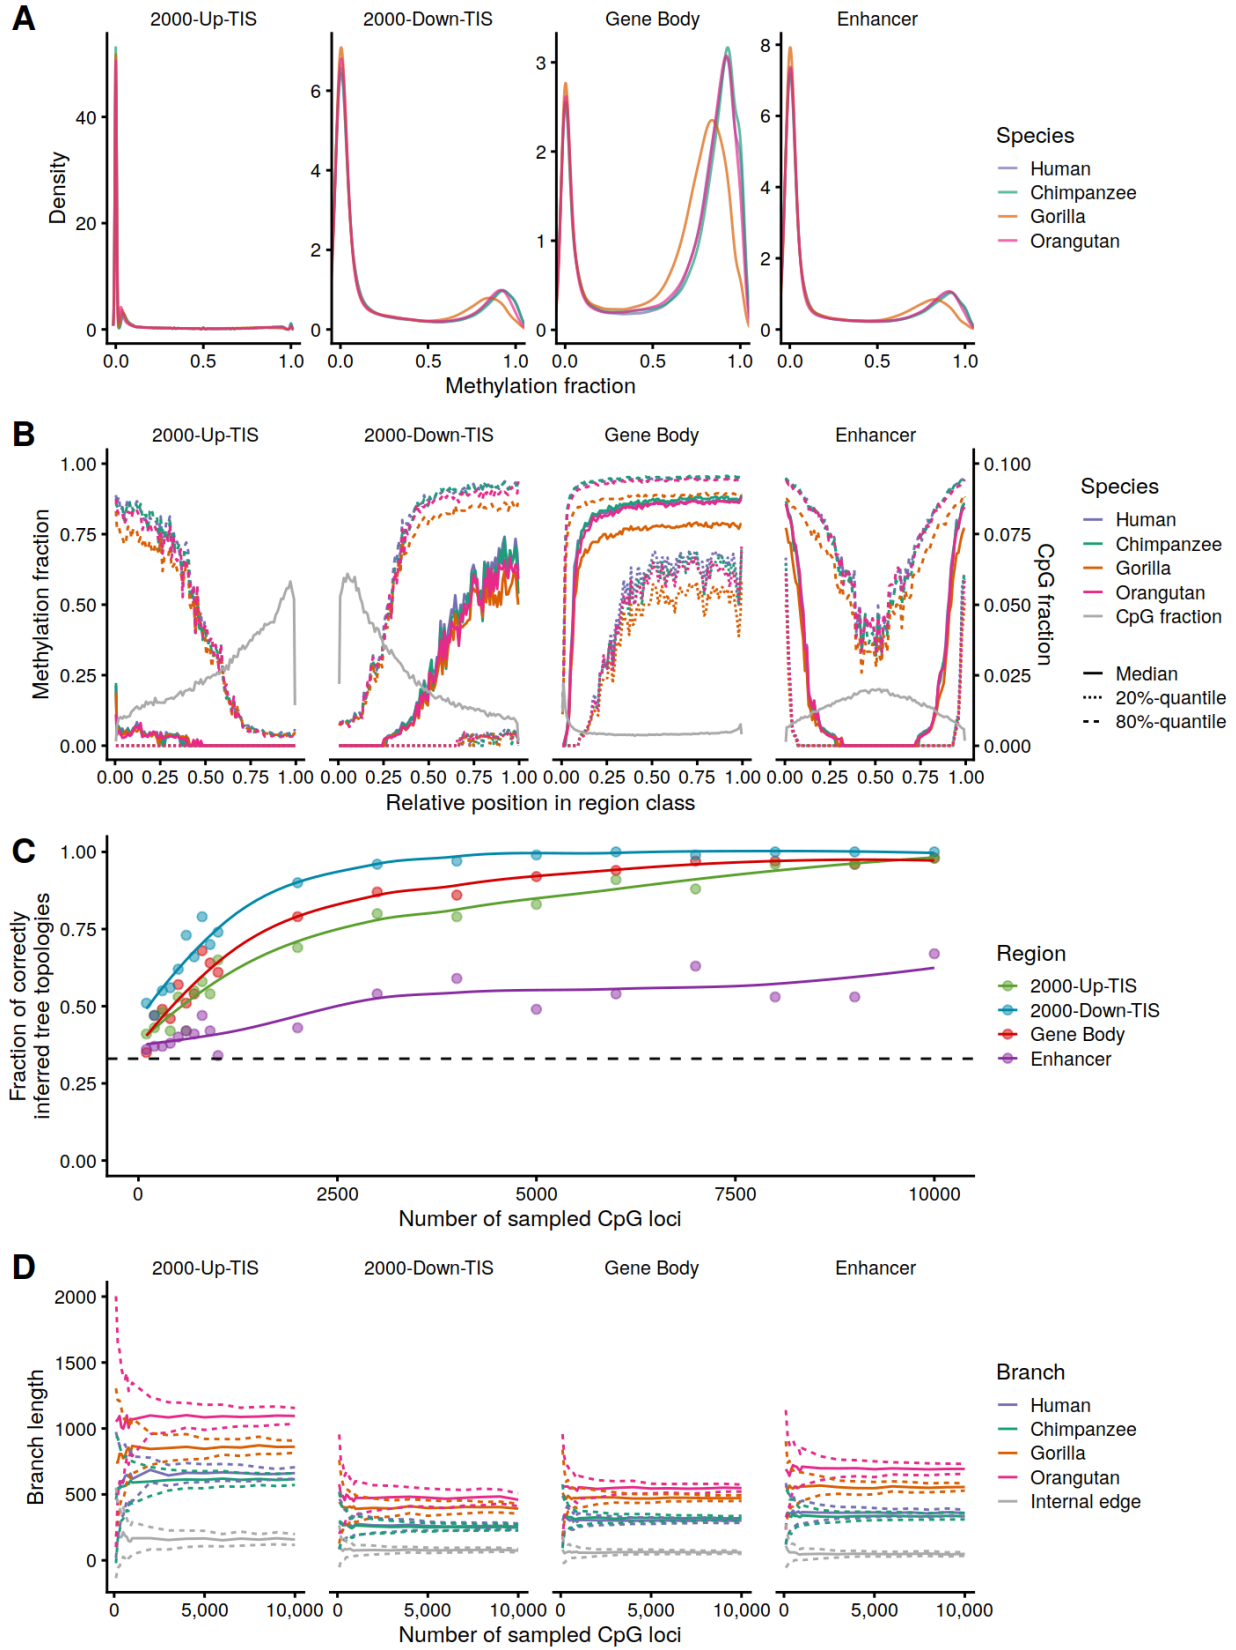

296 **Fig. 3.** A) Distributions of methylation fractions in the examined regions and species. B) Methylation and CpG fractions by  
 297 relative position in region class. C) Comparison of examined regions by the fraction of correctly inferred tree topologies. The  
 298 total number of reconstructed trees per fixed amount of input data (i.e., Number of CpG loci) was always 100. D) Dispersion of  
 299 branch lengths in the examined regions. The dashed line indicates the probability of randomly reconstructing the correct tree  
 300 topology (one third). A,B,D) The given numbers of CpG loci were drawn from the respective region-wise methylation fraction  
 301 alignments with the following total numbers of evaluable CpG loci: Up-TIS-2000 – 126,560; Down-TIS-2000 – 134,686; Gene  
 302 body – 441,286; enhancer – 271,195.

303 **Table 1.** Average similarity of methylation fractions between and within species in percent.

|                                                       | <b>2000-Up-TIS</b> | <b>2000-Down-TIS</b> | <b>gene body</b> | <b>enhancer</b> |
|-------------------------------------------------------|--------------------|----------------------|------------------|-----------------|
| <b>Interspecies – comparison of species' consensi</b> |                    |                      |                  |                 |
| <b>human-chimpanzee</b>                               | 95.4               | 93.5                 | 90.0             | 92.9            |
| <b>human-gorilla</b>                                  | 94.9               | 92.7                 | 87.9             | 92.0            |
| <b>human-orangutan</b>                                | 94.6               | 92.6                 | 88.7             | 91.8            |
| <b>chimpanzee-gorilla</b>                             | 95.0               | 92.8                 | 87.6             | 92.1            |
| <b>chimpanzee-orangutan</b>                           | 94.7               | 92.7                 | 88.7             | 91.9            |
| <b>gorilla-orangutan</b>                              | 94.6               | 92.5                 | 87.2             | 91.3            |

304

### 305 **Tree reconstruction works best for TIS-downstream and gene body classes**

306 To get a more detailed view, we compared the classes of regions in terms of their potential to  
 307 reconstruct correct tree topology using the methylation data. With the default method, the 2000-Down-  
 308 TIS region contains the highest phylogenetic signal (Fig. 3C). Notably, this class has by far the highest  
 309 proportion of hemi-methylation (0.2-0.8). It seems plausible that CpGs, which are neither fully  
 310 methylated nor demethylated across the tissue, also have the technical ability of being phylogenetically  
 311 most informative. It is well documented that an increase in methylation downstream of the  
 312 transcription start site and thus potentially overlapping with translated regions may have a strong  
 313 suppressive effect on gene expression (confer Fig. 3 of (Ehrlich and Lacey 2013); (Appanah, et al. 2007)).  
 314 At the same time, the region overlaps with proximal parts of the gene body where a hypermethylation is  
 315 frequently associated with strong expression (Zemach, et al. 2010). In conjunction with the high level of



316 global similarity established above, these results provide further evidence that specific phylogenetic  
317 information is embedded in this regulatorily relevant region. In addition to informative signals in  
318 regulatory regions, also inter-species expression differences may contribute to the surprisingly high rate  
319 of correct reconstructions. The observation that tree reconstruction based on the gene body works  
320 second best supports this notion.

321 With the notable exception of enhancers, the proportion of correctly reconstructed tree topologies  
322 converges clearly towards 1 in all region classes, depending on the amount of available data (Fig. 3C).  
323 The result is similar concerning the second benchmark, i.e. whether the determined branch lengths  
324 converge with increasing data volume. This is the case for all branches of the great apes in all regions  
325 studied (Fig. 3D).

### 326 **Methylation-based tree reconstruction may outcompete nucleotide-based reconstruction**

327 For comparison, we juxtaposed methylation based reconstruction with classical nucleotide based  
328 reconstructions. For the gene body and Up-TIS-2000 classes, the fraction of correctly inferred trees is  
329 almost identical for methylation and nucleotide data. Most strikingly, using methylation data from the  
330 Down-TIS-2000 class reconstruction clearly outcompeted nucleotide-based reconstruction. Conversely,  
331 reconstruction based on methylation data obtained from enhancer regions essentially failed (Fig. 4A). In  
332 the light of high similarities of methylation fractions in this region (Table 1), this result is most surprising.

333 To additionally quantify the performance of methylation based reconstruction, we generated artificial  
334 MFAs in complete analogy to nucleotide- or amino acid based alignments frequently used in the  
335 assessment of reconstruction algorithms or evolutionary models (e.g. (Rosenberg and Kumar 2001;  
336 Zhang, et al. 2005; Shavit Grievink, et al. 2010; Zaheri, et al. 2014)). Using these MFAs, we reconstructed  
337 phylogenetic trees and determined the fraction of correct topologies (Fig. 4A). The procedure was  
338 repeated after adding different levels of artificial noise to the simulated methylation fraction

339 alignments. At a noise level between 0.1 and 0.2 standard deviations the reconstruction performance of  
 340 simulated data is at par with real data derived from gene body and Up-TIS-2000. Consistently, enhancers  
 341 perform worse with values corresponding with noise between 0.2 and 0.4 standard deviations, while the  
 342 Down-TIS-2000 class shows substantially better benchmarks with values between 0.05 and 0.1 standard  
 343 deviations.

344

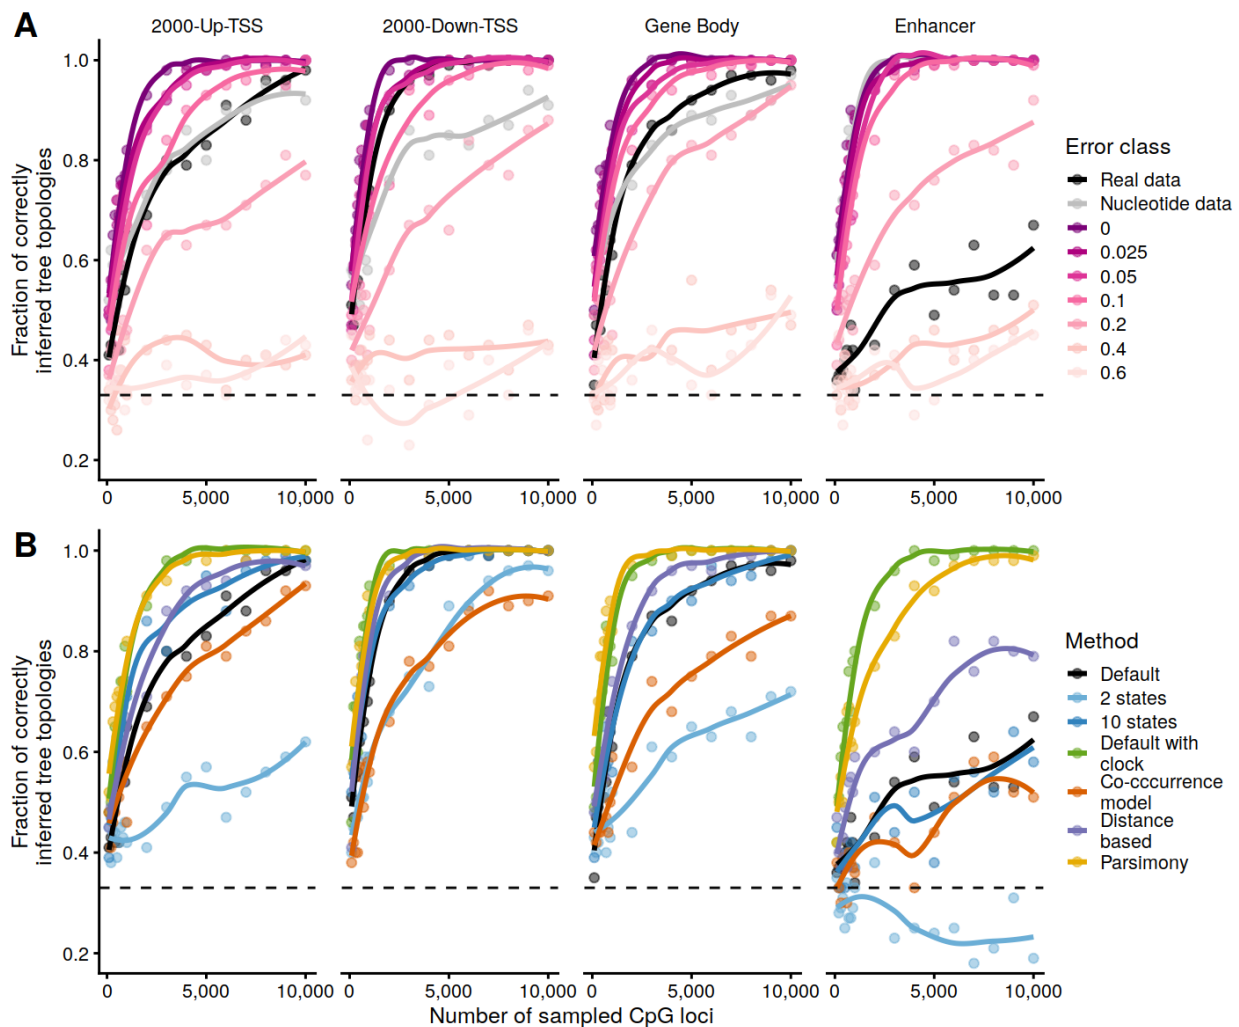

345

346 **Fig. 4.** A) Model vs reality. The performance difference between the simulated data and the real data gives an estimate of how  
 347 well the model matches reality. We first pretended that the model of the default method perfectly reflects reality: this model  
 348 and the known phylogenetic tree of the great apes were used to generate artificial alignments. We then reconstructed  
 349 phylogenetic trees from these alignments using the same model and applied the quality scale of fraction of correctly

350 reconstructed tree topologies. To quantify the difference of model and reality, we additionally applied defined error terms, i.e.  
351 fractions of the standard deviation of the standard normal distribution, to the artificial alignments before tree reconstruction.  
352 B) Comparison of the different methods (or deviations of our standard method) by fractions of correctly reconstructed tree  
353 topologies. The given numbers of CpG loci were drawn from the respective region-wise methylation fraction alignments with  
354 the following total numbers of evaluable CpG loci: Up-TIS-2000 – 126,560; Down-TIS-2000 – 134,686; Gene body – 441,286;  
355 enhancer – 271,195. A-B) The total number of reconstructed trees per fixed amount of input data (i.e., Number of CpG loci) was  
356 always 100. The dashed line indicates the probability of randomly reconstructing the correct tree topology (one third).

357 In summary, the reconstruction of phylogenetic trees from DNA methylation data seems to work well.  
358 The performance compared to nucleotide data is astonishing since methylation can be expected to be  
359 subject to frequent changes. Unlike DNA sequences, they are influenced by circadian rhythms,  
360 environmental factors or diseases. Clearly, in practice, the success of a methylation based  
361 reconstruction critically depends on the amount of available data, e.g. the read coverages achieved in  
362 WGBS experiments, the quality of reference genomes and sequence alignments. Furthermore, the  
363 reconstruction of phylogenies in single genes is naturally limited by the number of available data points.  
364 While the body of a protein coding gene has often more than 10,000 nucleotides, the measurement of  
365 the methylome is restricted to only 200 CpGs (Fig. S8). Experimental or biological noise may thus easily  
366 lead to faulty reconstructions. Unlike the genome, which is almost identical in all cells of an individual,  
367 the epigenome may reflect tissue-specific phylogenetical information. Thus, inter-species comparisons  
368 yield the potential of gaining insights into the evolution of tissues as opposed to the entire organism.  
369 The incorporation of other epigenetic data, e.g. histone modifications, will be helpful to illuminate such  
370 processes.

### 371 **Failure of tree reconstruction at enhancers**

372 Triggered by the surprisingly bad tree reconstruction with enhancer methylation data, we characterized  
373 all sites individually with respect to their phylogenetic information. Theoretically, enhancers may escape  
374 our evolutionary models because of their functional heterogeneity, the concrete effect of enhancer-  
375 methylation on gene expression and their plasticity in terms of tissue-specificity or circadian effects  
376 (Angeloni and Bogdanovic 2019). Specifically, we assigned a score to each site quantifying its support of  
377 the correct tree topology and analyzed the score distributions. Compared to the most similar down-TIS-

378 2000 class (cf. Table 1; Fig. 3A), the enhancers clearly contain more sites with negative information  
379 scores. Replacement of the least informative 10% of enhancer CpGs with the bottom Down-TIS-2000  
380 CpGs (see Methods, Fig. S9), confirms the disproportionate impact of these sites on tree reconstruction.  
381 Un-informative CpG-sites show a significantly higher methylation fraction than the average enhancer  
382 class site (almost 0.6 vs. 0.4,  $p < 2.2 \cdot 10^{-16}$ , Wilcoxon test). Furthermore, these sites are slightly enriched  
383 at 5' and 3' ends of enhancers (Fig. S10). The analysis of genes significantly affected by un-informative  
384 signals (FDR < 0.1, Fisher-Test, 1092 out of 6328 significant, Table S2) reveals an enrichment of the IL12  
385 pathway (BIOCARTA\_IL12\_PATHWAY, FDR = 0.03; BIOCARTA\_NO2IL12\_PATHWAY, FDR = 0.05) as well as  
386 leukocyte and lymphocyte differentiation (GO\_LEUKOCYTE\_DIFFERENTIATION, FDR = 0.01;  
387 GO\_LYMPHOCYTE\_ACTIVATION, FDR = 0.09). Since immunity-related genes themselves are targets of  
388 rapid evolutionary changes (Shultz and Sackton 2019), it is tempting to speculate that also sudden  
389 methylation changes within associated regulatory elements contribute to shaping the evolution of the  
390 immune response. Our data supports this hypothesis, as CpG methylation would be phylogenetically  
391 informative only at very short evolutionary distances.

### 392 **Non-binary models of CpG methylation work best for tree reconstruction**

393 As shown in Fig. 4B, the model selection has a critical impact on phylogenetic reconstructions based on  
394 methylation data. The default No Jump Model is based on the idea that within short periods of time it is  
395 only possible to switch to adjacent states (Fig. 2). If a change from state A to a non-adjacent state B is to  
396 be made over a longer period of time, all intermediate states between A and B must be transited. With  
397 the alternative Co-occurrence Model, we permit sudden changes to non-adjacent states. Interestingly,  
398 the Co-occurrence Model consistently performs much worse than the No Jump Model across all regions.  
399 This behavior immediately raises the question to which extent such states are also functionally relevant.  
400 In contrast, when increasing the number of states to 10 typically no or only minimal improvement is  
401 observed. Naturally, the precise resolution of tissue-wide methylation fractions critically depends on the

402 read coverage. Thus, for the data used in this study, a ten-state model likely is too fine-grained and over-  
403 specified.

#### 404 [Tree reconstruction from DNA methylation data faces similar challenges as for nucleotide data](#)

405 The presented default method builds on assumptions frequently made in the analysis of evolutionary  
406 relationships. To investigate the influence of those assumptions, we added a model with a molecular  
407 clock (1), used Neighbor Joining as a distance-based method for tree reconstruction (2), and applied the  
408 Maximum Parsimony principle (3; Fig. 2). All of the three models consistently perform better than the  
409 default method across all regions as measured by the proportion of correctly reconstructed topologies  
410 (Fig. 4B). For several reasons, it is frequently assumed that Maximum Likelihood is preferable to  
411 Maximum Parsimony or distance-based methods like Neighbor Joining (Felsenstein 1978; Hasegawa, et  
412 al. 1991; Kuhner and Felsenstein 1994; Guindon and Gascuel 2003). On the other hand, simulation and  
413 empirical studies at the nucleotide level have demonstrated that the fraction of correctly reconstructed  
414 topologies is often smaller as compared to other methods (Kolaczkowski and Thornton 2004; Yoshida  
415 and Nei 2016). Since the phylogenetic reconstruction for great apes clearly benefits from the molecular  
416 clock assumption on the nucleotide level (Moorjani, et al. 2016; Besenbacher, et al. 2019) and that the  
417 evolutionary rates at CpG dinucleotides are the most similar (Kim, et al. 2006), it can be expected that  
418 the molecular clock also improves the reconstruction performance based on MFAs. However, similar to  
419 the situation on the nucleotide level, this observation may not be generalized. Therefore, we have  
420 investigated the performance of the three methods in a scenario in which the evolutionary rates of the  
421 species diverge more strongly. Specifically, we carried out the simulations described above with a  
422 substantially higher evolutionary rate for one species than for the others (Fig. S11). Similar to the  
423 situation on the nucleotide level, maximum parsimony, and models that assume a molecular clock fail  
424 under this condition (Felsenstein 1978; Bergsten 2005). Also, the Neighbor Joining method performs  
425 significantly worse than our default method in these scenarios (Fig. 5A).

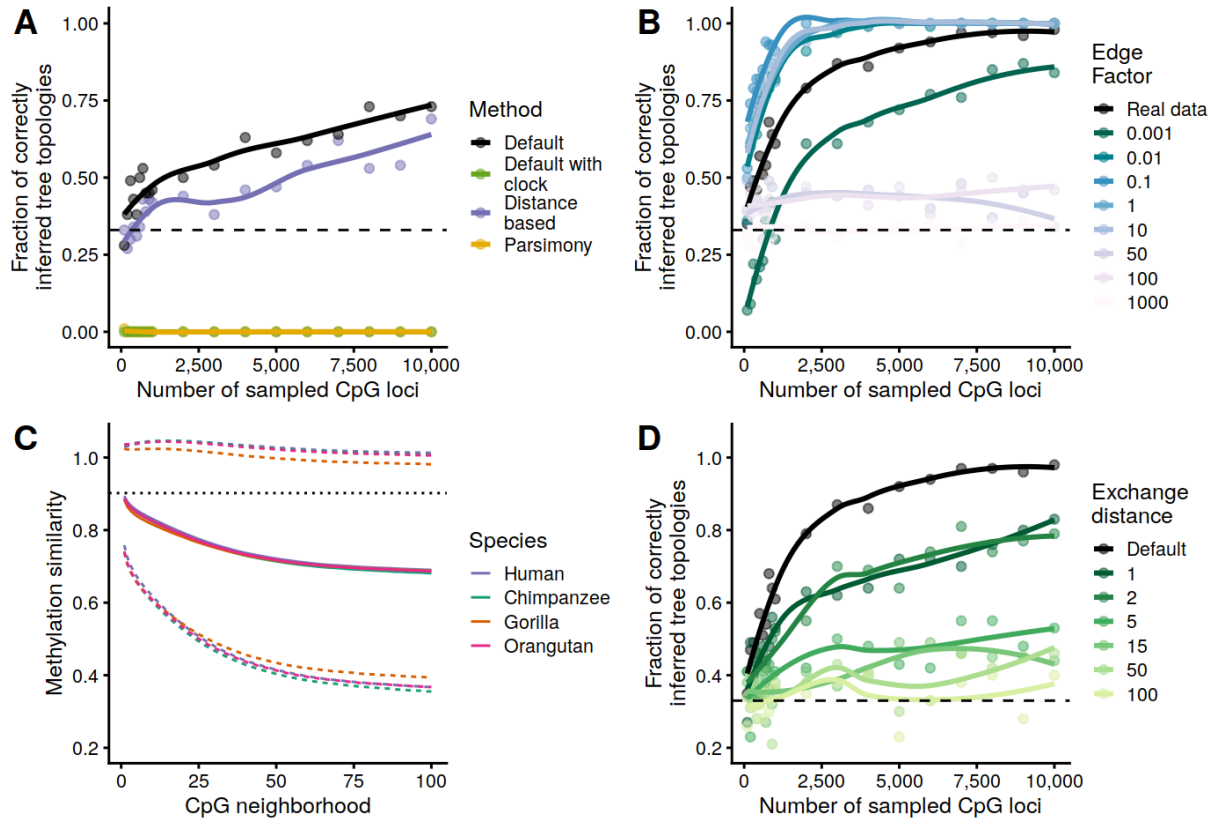

426

427 **Fig. 5.** A) Comparison of selected methods in a long-branch attraction scenario. We generated artificial alignments using the  
 428 model of our default method and a modified version of the great apes' phylogenetic tree. The tree used for alignment  
 429 generation was modified in such a way that one terminal branch was given a multiple of its original length. Then, trees were  
 430 reconstructed from the alignments and the scale of the fraction of correctly inferred topologies applied. B) Resolution limits  
 431 depending on the branch length. The same procedure as in A) was followed. The known phylogenetic tree of the great apes  
 432 was used, however, for alignment generation, whereby all branch lengths were multiplied by fixed factors (Edge factor). C)  
 433 Methylation similarity as a function of CpG neighborhood. We define the x-neighborhood of a CpG as the set consisting of the x-  
 434 nearest CpG upstream and the x-nearest CpG downstream. Shown are the average similarities (solid line) and standard  
 435 deviations (dashed line) of the methylation fractions for all corresponding x-neighborhood pairs. For comparison, the average  
 436 similarity of the orthologous human-chimpanzee methylation fractions is also shown (dotted line, see also Table 1). D) Local  
 437 signal resolution/alignment sensitivity. Phylogenetic trees were reconstructed from the real data set (great apes) using  
 438 modified methylation fractions alignments. The alignments were modified so that methylation fractions were exchanged with a  
 439 certain probability for a random methylation fraction of the same species within the given exchange distance. A, B, D) The  
 440 dashed line indicates the probability of randomly reconstructing the correct tree topology (one third). A-D) The total number of  
 441 reconstructed trees per fixed amount of input data (Number of CpG loci) was always 100. The region examined here was the  
 442 gene body. The total number of evaluable CpG loci in this region is 441,286.

443 Based on the above-justified assumption that the default method sufficiently recovers the "true"  
 444 phylogeny of species, we tried to obtain a rough estimate about the evolutionary distances to which it  
 445 can be applied. For this purpose, we carried out a benchmarking where the branch lengths of the trees  
 446 used for simulation were multiplied by a fixed factor. Our results indicate, that the default method  
 447 should work similarly well for evolutionary distances ranging from one percent to 10 times the real data

448 scenario (great apes) (Fig. 5B). Given the evolutionary rates of the great apes' example and assuming  
449 that their last common ancestor lived about 15 million years ago (Locke, et al. 2011), one can cautiously  
450 estimate that the method would be suitable for distances of several 100 thousands to more than 100  
451 million years.

#### 452 **DNA methylation is conserved at the individual CpG site level**

453 To investigate the degree of local conservation of methylation fractions, we determined the similarity of  
454 methylation for neighboring CpGs, defined as  $1 - |X_{i,a} - X_{j,a}|$ , where  $X_{i,a}$  and  $X_{j,b}$  are the methylation  
455 fractions at CpG-site  $i$  and  $j$  in species  $a$ , respectively. This similarity is contrasted with similarities of  
456 fractions in the spacial neighborhood of each individual species. Specifically, we define the 1-  
457 neighborhood of a CpG as the set of the next upstream CpG upstream and the next downstream CpG  
458 (without the CpG in the middle). The 2-neighborhood consists of the next but one CpGs in both  
459 directions (without the three CpGs in the middle) and so on. Expectedly, the average similarity of  
460 methylation decreases with growing neighborhoods towards a baseline level in all classes of regions. In  
461 the 2000-Down-TIS region, for instance, a similarity level of about 93% in the 1-neighborhood, decreases  
462 to about 80% in the 25-neighborhood and remains almost constant from then on (Fig. 5C, Fig. S12A).  
463 Strikingly, the class-dependent relationship between neighborhood and methylation similarities is  
464 practically identical in all of the investigated species. To put this observation into context, we contrasted  
465 the averaged neighborhood similarities with the similarity of methylation rates between two species at a  
466 given CpG, i.e. the in-between similarity. In any given class, the in-between similarity is at least as strong  
467 as the 3-neighborhood across all species. For the species pair human-chimpanzee, for instance, the in-  
468 between similarity is greater than that of the 1-neighborhood. In other words, our data indicates that,  
469 although separated by millions of years of evolution, the methylation rate of a CpG in humans is on  
470 average more similar to its orthologous CpG in chimpanzees than to that of its closest neighboring CpG.  
471 (Fig. 5C, Fig. S12A). To further investigate this, we have randomly swapped the methylation fractions of



472 the real ape data set within defined exchange distances before reconstructing the phylogenetic trees.  
473 Even an exchange distance of one results in a significant decrease in the proportion of correct  
474 topologies, which continues to increase as the exchange distance is enlarged (Fig. 5D, Fig. S12B). This  
475 clearly indicates that the methylation on the DNA strand is conserved with high local resolution. On the  
476 flipside, this result also underscores the dependency of such methylation based studies on high-quality  
477 alignments – very much similar to studies based on the nucleotide or codon level (Jordan and Goldman  
478 2012).

### 479 **Transcription factors preferentially bind to epigenetically conserved gene loci**

480 Based on the observations of high inter-species similarity of CpG methylation (Table 1, Fig. 3A, 3B) and  
481 successful tree reconstruction using these data (Fig. 3C, 4A), we calculated a gene-wise estimates of the  
482 evolutionary rates to illustrate potential benefits of studies into epigenomic conservation. As described  
483 above, studies on a single gene level critically depend on the amount of evaluable data. With the data  
484 set at hand, the criteria for a thorough single-gene-based hypothesis testing are limited. In the context  
485 of this work we restrict ourselves to representative examples. *CASTOR1* codes for a component of the  
486 MTORC pathways (Saxton, et al. 2016) and is an example of a modestly conserved gene according to our  
487 epigenomic measure (Fig. 6A), i.e. the estimated rate of evolution is almost exactly that of the region  
488 average. Upon closer inspection, however, we observe that the local methylation level is anticorrelated  
489 with the transcription factor binding density, i.e. the number of different binding transcription factors  
490 normalized by gene length, which we determined based on publicly available data (Karolchik, et al.  
491 2004). We also found that the rate at which a genes' methylation level evolves is globally anticorrelated  
492 with the binding density of the transcription factors ( $\rho = -0.22$ ,  $p < 2.2 \cdot 10^{-16}$ , Table S3). As a second  
493 intuitive measure for assessing functional aspects of epigenomic conservation, we determined how  
494 much the respective gene tree deviates from the average tree of the region class (see Supplement  
495 methods for details). *C16orf86* codes for a probably functional but so far uncharacterized protein and an



496 example of a strong deviation (Fig. 6B). According to the described measure and our used filter  
497 criteria, the gene shows the highest deviation from the expected tree. According to our model, this  
498 deviation can be attributed almost exclusively to an increased evolutionary speed in humans.  
499 Interestingly, however, methylation levels in humans were only locally significantly different to other  
500 species between nucleotide positions 180 and 530. This sequence between the mentioned nucleotide  
501 positions is partly coding for a fully conserved domain of unknown function (pfam15762, DUF4691) and  
502 shows a relatively high TFBS density in humans. It is tempting to speculate that in the other great apes  
503 the relatively higher methylation may leads to a lower transcription factor binding density in this region.

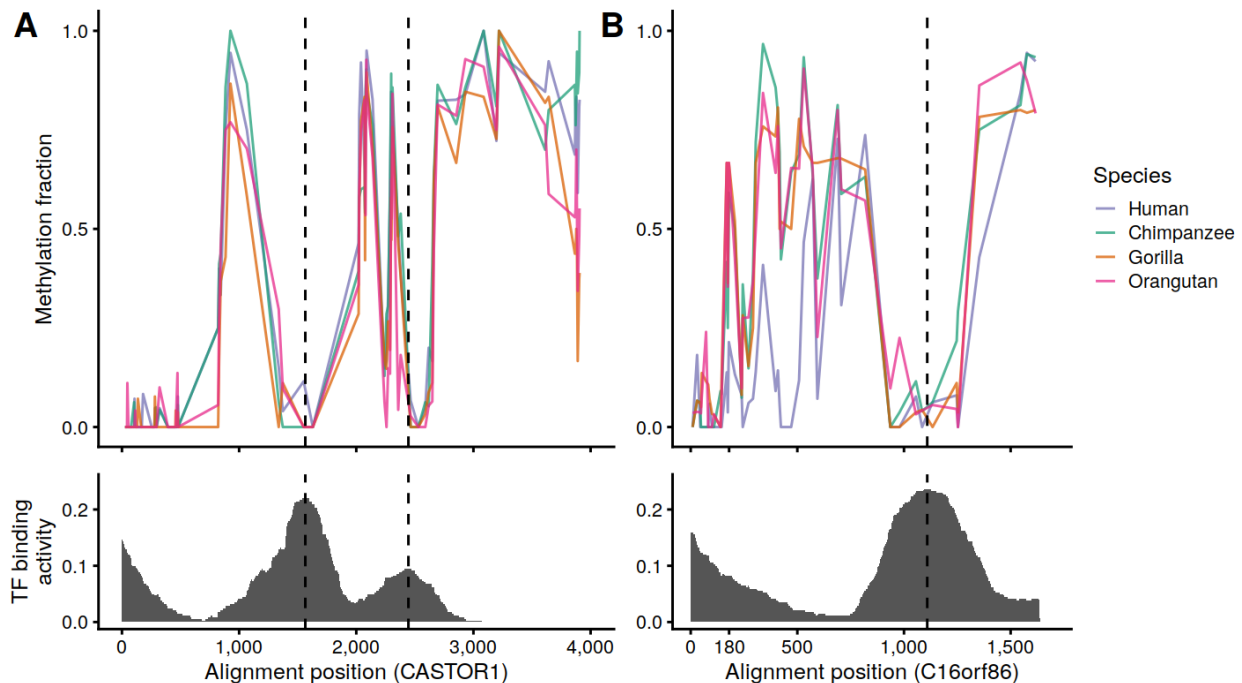

504

505 **Fig. 6** A) Measured methylation fractions and estimated local transcription factor binding density in the gene body of *CASTOR1*.  
506 The total number of evaluable CpG loci is 81. 19 CpG loci were skipped due to low read support (<10 reads in at least one  
507 species). B) Measured methylation fractions and estimated local transcription factor binding density in the gene body of  
508 *C16orf86*. The total number of evaluable CpG loci is 45. 4 CpG loci were skipped due to low read support (<10 reads in at least  
509 one species).

### 510 Hints of accelerated epigenomic evolution for PRC2 protein binding sites

511 Based on our finding that transcription factor binding density appears to be negatively correlated with

512 our measures for epigenomic evolution we were specifically interested to characterize individual

513 transcription factors in terms of their evolutionary rates. To do this, methylation rates of aligned gene  
514 body CpGs overlapping with a specific TF were combined. In total, 297 out of 340 transcription factors  
515 comprised at least 1.000 CpG sites - the chosen minimum to include a TF in this analysis. The strongest  
516 deceleration on the human branch has been observed for RNA-binding-protein 34, RBM34. While little is  
517 known about the function of this gene, its binding to DNA might be influenced by the CpG-methylation.

518 Significantly accelerated rates (FDR  $\leq$  0.01; see Methods) were found for about a third of TFs (n=98) in  
519 humans (Fig. 7A). Strikingly, this set appears to enrich critical components of the polycomb repressive  
520 complex 2 (PRC2) complex, namely, YY1, EZH2, HDAC1, HDAC2, BMI1, and SUZ12 (BIOCARTA PRC2  
521 pathway; FDR=0.092). Binding sites of the two histone deacetylases are also components of the  
522 significantly enriched telomerase pathway (Pathway Interaction Database; FDR = 0.0026) additionally  
523 comprising accelerated TFBS of XRCC5, MAX, SP1, IRF1, MYC, NBN, NR2F2, E2F1, SAP30, SIN3A and  
524 SIN3B. The strongest accelerations with a more than 50% increased evolutionary rate on methylation  
525 level were found for ZZZ3, CBX2, MYB, CDC5L, MIER1 and BRCA1. The zinc-finger ZZZ3, a component of  
526 the Ada-two-A-containing (ATAC) histone acetyl-transferase complex, has recently been described to  
527 function as a reader of histones regulating ATAC-dependent promoter histone H3K9 acetylation (Mi, et  
528 al. 2018). It is tempting to speculate that evolutionarily driven changes of ZZZ3 binding characteristics  
529 could have a decisive impact on species-specific gene expression. The chromobox homolog protein 2  
530 (CBX2), also a reader of histone modifications, is a member of the polycomb repressive complex 1  
531 (PRC1) (Vandamme, et al. 2011). It contributes to the repression of genes by binding to H3K9me3 and  
532 H3K27me3.

533 One of the strongest evolutionary accelerations on the methylation level can be observed at the TFBS of  
534 BRCA1. Notably, the gene itself has been found to undergo a rapid evolution driven by positive selection  
535 altering its amino-acid composition as well its non-coding parts (Pavlicek, et al. 2004; Lou, et al. 2014).

536 Involved in double strand break repair, BRCA1 is frequently mutated in hereditary forms of human  
537 breast cancers. Thus, our data suggests that the accelerated evolution of BRCA1 in humans compared to  
538 other great apes (Fig. 7A) has a measurable impact on the methylation landscape around its binding  
539 sites. At the same time, on the sequence level, BRCA1 binding sites evolution appears to be substantially  
540 decelerated (Fig. 7B). This marked lack of co-variance potentially supports the functional effects of  
541 changes in the BRCA1 gene itself. Notably, BRCA1's direct interaction partner, the estrogen receptor  
542 ESR1, exhibits a comparably high evolutionary rate across all primates on the methylation level as  
543 compared to the sequence of its binding sites (Fig. 7A, 7B). The systematic comparison of sequence-  
544 based and methylation-based evolutionary rates reveals an acceleration of binding sites for transcription  
545 factors involved in neuron differentiation (GO\_NEURON\_DIFFERENTIATION, FDR = 0.03) and two highly  
546 connected pathways, AP-1 (FDR = 0.03, PID\_AP1\_PATHWAY) and FRA (ii, FDR = 0.02,  
547 PID\_FRA\_PATHWAY), due to the constitutive components of the heterodimeric AP-1, including, e.g.,  
548 FOS, the ATF family, GATA2 and JunB (Fig. 7B). The proteins belonging to the AP-1 family play a critical  
549 role in numerous cellular processes. Notably, in cooperation with other cell-type specific factors it is  
550 involved in the activation of cell-type specific enhancers (Madrigal and Alasoo 2018). Hence, this result  
551 may be explained by species-specific cell compositions, systematic environmental or nutritional  
552 differences. Nevertheless, it is tempting to speculate that the enrichment of these factors may point to  
553 combinatorial changes of AP-1 composition during evolution.

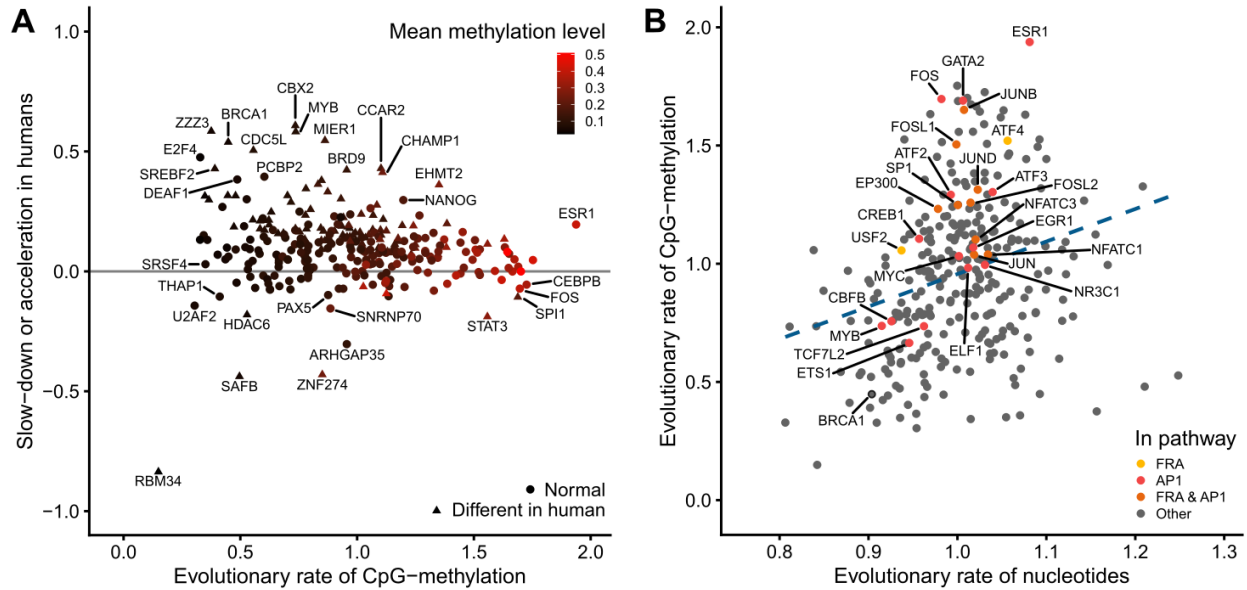

554

555 **Fig. 7.** A) Estimated evolutionary rate of transcription factor binding sites on CpG-methylation level in great apes vs relative  
 556 slow-down/acceleration of this rate in humans. Triangles mark transcription factor binding sites with statistically significant  
 557 deviation of the human evolutionary rate (FDR<0.01, maximum likelihood ratio test, see *Methods* chapter *Methylation at*  
 558 *transcription factor binding sites*). The color codes the mean methylation level across all evaluable CpG sites in the binding sites  
 559 of the respective transcription factor. B) Estimated evolutionary rate of transcription factor binding sites on nucleotide vs CpG-  
 560 methylation level. The dashed line indicates a simple linear regression of the two evolutionary rates. Color-coded are all names  
 561 of transcription factors that are part of the pathways that are listed by the legend (Pathway Interaction Database (Schaefer, et  
 562 al. 2009)). A, B) Shown are those 297 out of 340 transcription factors from the UCSC hg38 *Transcription Factor ChIP-seq Clusters*  
 563 track (Karolchik, et al. 2004) that comprised at least 1.000 evaluable CpG sites.

## 564 Conclusions

565 Here, we have systematically transferred classical methods of phylogenetics used to analyse nucleotide  
 566 and amino acid sequences, to the field of epigenomics. Using empirical data from great apes, we  
 567 demonstrate that phylogenetic trees can be correctly reconstructed from methylation data based on the  
 568 fundamental principles of maximum likelihood, parsimony, and distance-based approaches. The  
 569 problems and challenges are similar in many respects to tree reconstruction from nucleotide data, e.g.

570 that parsimony and distance based methods are prone to long branch attraction. Nevertheless, we  
571 found that all examined regions with the notable exception of enhancers contain enough of  
572 phylogenetic information on CpG-methylation level to outcompete reconstruction with nucleotide data.  
573 The ability of the enhancers to escape the evolutionary model can be attributed to a relatively small set  
574 of CpG sites. The enrichment of these sites in quickly evolving immune-related genes highlights the  
575 importance of the epigenome for short-term evolutionary changes. Based on the empirical data and  
576 simulations, we showed that methylation levels are conserved at single CpG resolution. The methylation  
577 fraction of a CpG can usually be better predicted from the methylation fraction of an orthologous CpG in  
578 a species separated by millions of years of evolution than even from the methylation fraction of the  
579 closest CpG in the same species. We also found evidence that epigenetic conservation is associated with  
580 enhanced transcription factor binding density. Evolutionary rates on the nucleotide level were, as  
581 expected, found to be highly correlated with those CpG methylation level across transcription factor  
582 binding sites. However, significant deviations from this general trend are observed for binding sites of  
583 transcription factors associated with neuron differentiation and components of the heterodimeric AP-1  
584 evolving significantly faster on the methylation level. Multiple examples provide hints that epigenomic  
585 re-modellers themselves could be critical components in the evolution of the human lineage.  
586 Significantly elevated evolutionary rate on methylation level in humans as compared to other great apes  
587 were found at TFBS of BRCA1, CBX2, ZZZ3, MIER1 and MYB. On a global level, critical components of the  
588 polycomb repressive complex 2 and members of the telomerase pathway show an accelerated CpG  
589 methylation evolution in humans.

590 In the future, when data will be collected for different epigenetic marks across multiple tissues, these  
591 methods would be helpful to test for accelerated or slowed epigenetic evolution affecting individual  
592 genes. This promises new insights into the evolution of ontogenesis, mechanisms of epigenetic gene  
593 regulation and possibly the formation of phenotypes based on these mechanisms.

## 594 Supplemental methods

### 595 Read mapping and quantification of methylation at individual CpGs

596 The soft masked versions of the following reference genomes were downloaded from ensemble release  
597 95: GRCh38 (human), Pan\_tro\_3.0 (chimpanzee), gorGor4 (gorilla), PPYG2 (orangutan). Only  
598 chromosome entries from the reference genomes were considered for further analysis. Reads from the  
599 test data set were adapter clipped using TrimGalore (<https://github.com/FelixKrueger/TrimGalore>,  
600 version 0.4.5\_dev, (Martin 2011)) mapped against the respective reference genome using segemehl,  
601 version 0.3.4 (Hoffmann, et al. 2014) with the parameter “-F 2” for the bs-seq protocol that was also  
602 used in the original study (Hernando-Herraez, et al. 2015). Subsequently, only unique mapping reads  
603 were considered as indicated by the NH:i:1 tag and duplicons were removed using samtools markdup,  
604 version 1.10 (Li, et al. 2009) (see Table S1 for mapping and duplicon rates). Methylation fractions at  
605 individual sites were determined using the haarz program from the segemehl package. Only methylation  
606 fractions within a CpG-context were considered for further analysis.

### 607 Phylogenetic information of methylation values

608 To better elucidate the impact of individual methylation values for the reconstruction of the correct tree  
609 topology, we consider the phylogenetic information score  $PIS^i$  of site  $i$ . Let  $\mathcal{L}_{topology}$  be the maximized  
610 likelihood of the complete regions class' data (with  $k$  CpG sites) and the unrooted *topology*, i.e.  
611  $\mathcal{L}_{topology} = \prod_{i=1}^k \mathcal{L}_{topology}^i$ . Then, we define  $PIV^i$  as follows:

$$612 \quad PIS^i = \ln(\mathcal{L}_{correct\_topology}^i) - \frac{\ln(\mathcal{L}_{wrong\_topology\_1}^i) + \ln(\mathcal{L}_{wrong\_topology\_2}^i)}{2}$$

613 First, for each region class, sites are sorted with respect to their phylogenetic information. Subsequently,  
614 methylation values for sites within the lowest or highest quantiles are replaced with values from other

615 classes. For instance, by removing 5% enhancer sites with lowest phylogenetic information with the  
616 same amount of sites sampled from the lowest 5% of Down-TIS-2000 class. Here, the performance of  
617 these mixed sets are evaluated by the correct tree topology benchmark (Fig. S9).

618 Specifically, we tested which enhancers were enriched for the 10% sites with lowest phylogenetic  
619 information score using the Fisher-test, a significance threshold of  $FDR < 0.1$ , and all examined  
620 enhancers as background. Corresponding interaction genes were counted as affected only if all their  
621 known enhancers showed an enrichment of those sites. Pathway/gene set enrichment was performed  
622 as described in *Methylation at transcription factor binding sites*.

### 623 **Methylation at transcription factor binding sites**

624 To reveal potential functional consequences of epigenomic conservation, we focused on the  
625 methylation at known transcription factor binding sites (TFBS). For each of the 340 transcription factors,  
626 all CpG sites within the gene body class covering the binding sites of an individual  $TF$ , were combined  
627 into a methylation fraction alignment  $X^{TF}$ . In addition, a methylation fraction alignment  $X^{TFs\_combined}$   
628 was created from the union of all CpG sites of the 340 transcription factors. To obtain a suitable  
629 reference, a phylogenetic tree was reconstructed from  $X^{TFs\_combined}$  using the default method and the  
630 known great ape tree topology. Subsequently, for each individual transcription factor  $TF$ , the default  
631 method was used on  $X^{TF}$ , forcing the branch lengths to be multiples of  $\tau_e^{TFs\_combined}$  via the  
632 contraction/expansion factor  $E'^{TF}$

$$633 \quad \tau_e^{TF} = \tau_e^{TFs\_combined} * E'^{TF}$$

634 The evolutionary rate  $E^{TF}$  of  $TF$  was estimated as that instance of  $E'^{TF}$  which resulted in the  
635 corresponding maximized likelihood  $L_{one\_rate}^{TF}$  using the default method. To test for an  
636 acceleration/deceleration on the human branch, one additional methylation-based tree was

637 reconstructed for each  $TF$  with the maximized likelihood  $L_{human\_extra}^{TF}$ . For this tree, all branches but  
638 the human branch were scaled with a fix contraction/expansion factor as before, while the human  
639 branch was free to vary. The actual phylogenetic hypothesis testing based on a likelihood ratio test then  
640 follows the standard procedure as described in the literature (see, e.g., (Huelsenbeck and Crandall  
641 1997)) using  $L_{human\_extra}^{TF}$  for the alternative hypothesis and  $L_{one\_rate}^{TF}$  for the null hypothesis. Test  
642 results are expected to be chi-square distributed with one degree of freedom. We used the Benjamini-  
643 Hochberg method for multiple test correction (Benjamini and Y. 1995) and a significance threshold of  
644  $FDR < 0.01$  on transcription factor level (Table S3). For comparison, a nucleotide sequence-based  
645 estimate of the evolutionary rate at the TFBS was calculated with a co-occurrence model using the same  
646 multiple sequence alignments from which the corresponding MFAs were derived (see *Identification of*  
647 *orthologous defined regions and CpG Alignment*).

648 Subsequently, enrichment analyses were performed with the following gene sets taken from the  
649 Molecular Signature Database collections (MSigDB, (Liberzon, et al. 2015)): Biological Process Gene  
650 Ontology (The Gene Ontology 2019), Pathway Interaction Database (Schaefer, et al. 2009) and Biocarta  
651 pathway database. The analyses were restricted to gene sets containing at least 6 transcription factors  
652 and carried out using a fisher test followed by Benjamini-Hochberg correction as well as the above  
653 mentioned 340 transcription factors as background (Benjamini and Y. 1995). The significance threshold  
654 was set to  $FDR < 0.1$ . The test was applied separately for transcription factors with accelerated and  
655 decelerated evolution on the human branch. To identify pathways with significantly higher or lower  
656 evolutionary rates on methylation level as compared to the nucleotide level, we applied a t-test to the  
657 residuals of a linear model by contrasting residuals of the transcription factors in the respective pathway  
658 gene set vs. the residuals of the other transcription factors. Normality of the residuals was confirmed  
659 using the Shapiro-Wilk test.



660 Furthermore, we were interested in finding out whether individual genes regulated by a transcription  
661 factor themselves differ in terms of their epigenomic evolutionary rates. We reconstructed gene trees  
662 from methylation fraction alignments  $X^g$  of single genes using our default method and enforcing the  
663 correct great apes topology. We consider a single epigenetic evolution rate  $E^g$  of the gene  $g$  as well as  
664 the associated deviation  $D^g$  from an expected tree based on  $E^g$  and the average tree across all genes.  
665 Genes are sorted with respect to both metrics and correlated with the estimate of the transcription  
666 factor binding density  $TFBD^g$ , i.e. the fraction of the 340 TFs having a binding site in the gene  $g$  divided  
667 by the gene length.

668 We define  $D^g = \arg \min_{E^g \in \mathbb{R}^{*+}} \sqrt{\sum_{e \in \Psi} (\tau_e^\mu - \tau_e^g / E^g)^2}$  and  $E^g$  as that instance of  $E^g$  that minimizes  $D^g$ .

669 In this context,  $\Psi$  is defined as the set of edges of the correct great apes tree topology,  $\tau_e^g$  as the branch  
670 length of edge  $e$  of the tree reconstructed from  $X^g$ , and  $\tau_e^\mu$  as the mean edge length of  $e$  from 100  
671 reconstructions from as many drawings of  $X$  with each having a sample size of  $N = 10,000$ .

672 For correlations and examples, no genes were considered that reached either the minimum or the  
673 maximum of the allowed branch length of our optimization algorithm, which filtered out about 60% of  
674 the genes.

## 675 **Simulations**

### 676 **Model vs. reality**

677 We analyzed the capability of the default method to describe the real data. To this end, we repeatedly  
678 compared artificial scenarios reflecting the evolutionary methylation model with different levels of noise  
679 added to the real great ape methylation data.

680 First, we first converted the simulated states into simulated methylation fractions. Specifically, we drew  
681 a methylation fraction  $M$  for the respective state  $s$  from the interval corresponding to the discretization

682 function  $d$  assuming a uniform distribution within the states. Subsequently, the noise  $\varepsilon$  was drawn from a  
683 normal distribution with mean 0 and a fixed standard deviation  $sd$ . The new state  $s^*$  corresponding to  $s$   
684 was then determined by

$$685 \quad s^* = d(\min(\max(M + \varepsilon, 0), 1))$$

686 The entire approach described in this section was performed for different values of  $sd$ . The expectation  
687 is that the quality measures deteriorate with increasing  $sd$ .

688 In addition to the comparison with the performance of simulated data, we also compared the  
689 methylation data with the results on nucleotide data. Basis for these results were the same nucleotide  
690 alignments from which also our MFAs were derived (see *Identification of orthologous defined regions*  
691 and *CpG Alignment*). For this exercise, nucleotides were drawn from the whole alignment instead of  
692 methylation fraction from CpG sites. Since the No Jump Model underlying the default method was not  
693 applicable to the nominal scaled nucleotide data, the Co-occurrence Model was used.

#### 694 **Resolution limits for reconstruction depending on the branch length**

695 We extended our simulations to obtain an estimate of the evolutionary time scales on which the default  
696 method would be able to generate reliable results. For this purpose, we assumed the evolutionary rates  
697 estimated from data (great apes) to be fixed. Accordingly, the branch lengths of the tree used to  
698 generate the alignment were multiplied by fixed edge factors. The approach was performed with the  
699 following edge factors: 0.001, 0.01, 0.1, 10, 50, 100, 1000.

#### 700 **Site-specificity of phylogenetic signals**

701 To find out to what extent the phylogenetic signal is site specific, i.e. to answer the question of whether  
702 the evolutionary conservation rather affects single CpG sites or larger regions containing multiple sites,  
703 we resorted to the MFA's obtained from real data (see *Preparation steps for empirical data*). Specifically,

704 methylation fractions of randomly chosen sites were replaced with values from nearby CpGs of the  
705 same species.

706 Let  $X^g = (X_{i,j}^g)$ , analogous to the definition of  $X$ , be the methylation fraction of the alignment of a gene  
707  $g$  with  $\lambda$  homologous CpG sites;  $1 \leq i \leq \lambda$ ,  $1 \leq j \leq l$ . For each alignment  $X^g$  we then generate a  
708 modified alignment  $X^{g*}$  using a fixed modification probability  $\rho$  and a fixed modification distance  $\delta$

$$709 \quad X_{i,j}^{g*} = \begin{cases} X_{i,j}^g, & \text{with probability } 1 - \rho \\ X_{\theta(\max(i-\delta,1), \min(i+\delta,\lambda)), j}^g, & \text{with probability } \rho \end{cases}$$

710 where  $\theta$  is a function  $\theta: \mathbb{N}^2 \rightarrow \mathbb{N}$ :

711  $\theta(\alpha, \beta) =$  random number from  $\{\alpha, \alpha + 1, \dots, \beta\}$ , with equal probability  $\frac{1}{\beta - \alpha + 1}$  for all possible outcomes

712 with  $\alpha \leq \beta$ . By column-wise concatenation all  $X^{g*}$  of a region, we create a merged modified alignment  
713  $X^*$  analogous to  $X$ . Finally, we apply the same procedure to  $X^*$  as described earlier in *Evaluation*  
714 *strategy* and *Maximum likelihood* for  $X$ .

715 For this exercise, we chose a modification probability  $\rho = 0.7$  and the modifying distance  $\delta$ . The  
716 expectation is that the quality measures will deteriorate with larger values for  $\delta$ .

### 717 **Long branch attraction**

718 To evaluate the tree reconstruction methods with more divergent evolutionary rates than those of the  
719 great apes, we again created an artificial alignment of 100.000 sites, however, a phylogenetic tree that is  
720 more susceptible to long branch attraction instead of the great ape phylogeny was used (Fig. S11,  
721 (Bergsten 2005)) Finally, the procedure described in *Evaluation strategy* was applied with different tree  
722 reconstruction methods.

723

## 724 **References**

- 725 Angeloni A, Bogdanovic O. 2019. Enhancer DNA methylation: implications for gene regulation. *Essays*  
726 *Biochem* 63:707-715.
- 727 Appanah R, Dickerson DR, Goyal P, Groudine M, Lorincz MC. 2007. An unmethylated 3' promoter-  
728 proximal region is required for efficient transcription initiation. *PLoS Genet* 3:e27.
- 729 Arun PVPS, Miryala SK, Chattopadhyay S, Thiyyagura K, Bawa P, Bhattacharjee M, Yellaboina S. 2016.  
730 Identification and functional analysis of essential, conserved, housekeeping and duplicated genes. *FEBS*  
731 *Letters* 590:1428-1437.
- 732 Barrero MJ, Boué S, Izpisúa Belmonte JC. 2010. Epigenetic Mechanisms that Regulate Cell Identity. *Cell*  
733 *Stem Cell* 7:565-570.
- 734 Benjamini Y, Y. H. 1995. Controlling the false discovery rate: A practical and powerful approach to  
735 multiple testing. *Journal of the Royal Statistical Society. Series B (Methodological)* 57:289-300.
- 736 Bergmiller T, Ackermann M, Silander OK. 2012. Patterns of evolutionary conservation of essential genes  
737 correlate with their compensability. *PLOS Genetics* 8:e1002803-e1002803.
- 738 Bergsten J. 2005. A review of long-branch attraction. *Cladistics* 21:163-193.
- 739 Besenbacher S, Hvilsom C, Marques-Bonet T, Mailund T, Schierup MH. 2019. Direct estimation of  
740 mutations in great apes reconciles phylogenetic dating. *Nature Ecology & Evolution* 3:286-292.
- 741 Böck J, Remmele CW, Dittrich M, Müller T, Kondova I, Persengiev S, Bontrop RE, Ade CP, Kraus TFJ, Giese  
742 A, et al. 2018. Cell Type and Species-specific Patterns in Neuronal and Non-neuronal Methylomes of  
743 Human and Chimpanzee Cortices. *Cerebral cortex (New York, N.Y. : 1991)* 28:3724-3739.
- 744 Boffelli D, Martin DI. 2012. Epigenetic inheritance: a contributor to species differentiation? *DNA Cell Biol*  
745 31 Suppl 1:S11-16.
- 746 Broyden CG. 1970. The Convergence of a Class of Double-rank Minimization Algorithms 1. General  
747 Considerations. *IMA Journal of Applied Mathematics* 6:76-90.
- 748 Burggren W. 2016. Epigenetic Inheritance and Its Role in Evolutionary Biology: Re-Evaluation and New  
749 Perspectives. *Biology (Basel)* 5.
- 750 Byrd RH, Lu P, Nocedal J, Zhu C. 1995. A Limited Memory Algorithm for Bound Constrained Optimization.  
751 *SIAM Journal on Scientific Computing* 16:1190-1208.
- 752 Capella-Gutiérrez S, Silla-Martínez JM, Gabaldón T. 2009. trimAl: a tool for automated alignment  
753 trimming in large-scale phylogenetic analyses. *Bioinformatics (Oxford, England)* 25:1972-1973.
- 754 Chen Z, Li S, Subramaniam S, Shyy JYJ, Chien S. 2017. Epigenetic Regulation: A New Frontier for  
755 Biomedical Engineers. *Annual Review of Biomedical Engineering* 19:195-219.
- 756 Cui R, Medeiros T, Willemsen D, Iasi LNM, Collier GE, Graef M, Reichard M, Valenzano DR. 2019. Relaxed  
757 Selection Limits Lifespan by Increasing Mutation Load. *Cell* 178:385-399 e320.
- 758 Ehrlich M, Lacey M. 2013. DNA methylation and differentiation: silencing, upregulation and modulation  
759 of gene expression. *Epigenomics* 5:553-568.
- 760 Felsenstein J. 1978. Cases in which Parsimony or Compatibility Methods will be Positively Misleading.  
761 *Systematic Biology* 27:401-410.
- 762 Felsenstein J. 1981. Evolutionary trees from DNA sequences: a maximum likelihood approach. *J Mol Evol*  
763 17:368-376.
- 764 Fitch WM. 1971. Toward Defining the Course of Evolution: Minimum Change for a Specific Tree  
765 Topology. *Systematic Biology* 20:406-416.
- 766 Fitch WM, Margoliash E. 1967. Construction of phylogenetic trees. *Science* 155:279-284.
- 767 Fletcher W, Yang Z. 2009. INDELible: a flexible simulator of biological sequence evolution. *Mol Biol Evol*  
768 26:1879-1888.

- 769 Gaya-Vidal M, Alba MM. 2014. Uncovering adaptive evolution in the human lineage. *BMC Genomics*  
770 15:599.
- 771 Ge RL, Cai Q, Shen YY, San A, Ma L, Zhang Y, Yi X, Chen Y, Yang L, Huang Y, et al. 2013. Draft genome  
772 sequence of the Tibetan antelope. *Nat Commun* 4:1858.
- 773 Goldman N, Yang Z. 1994. A codon-based model of nucleotide substitution for protein-coding DNA  
774 sequences. *Mol Biol Evol* 11:725-736.
- 775 Guindon S, Gascuel O. 2003. A simple, fast, and accurate algorithm to estimate large phylogenies by  
776 maximum likelihood. *Syst Biol* 52:696-704.
- 777 Hasegawa M, Kishino H, Saitou N. 1991. On the maximum likelihood method in molecular phylogenetics.  
778 *J Mol Evol* 32:443-445.
- 779 Hasegawa M, Kishino H, Yano T. 1985. Dating of the human-ape splitting by a molecular clock of  
780 mitochondrial DNA. *J Mol Evol* 22:160-174.
- 781 Hernando-Herraez I, Heyn H, Fernandez-Callejo M, Vidal E, Fernandez-Bellon H, Prado-Martinez J, Sharp  
782 AJ, Esteller M, Marques-Bonet T. 2015. The interplay between DNA methylation and sequence  
783 divergence in recent human evolution. *Nucleic Acids Research* 43:8204-8214.
- 784 Hoffmann S, Otto C, Doose G, Tanzer A, Langenberger D, Christ S, Kunz M, Holdt LM, Teupser D,  
785 Hackermüller J, et al. 2014. A multi-split mapping algorithm for circular RNA, splicing, trans-splicing and  
786 fusion detection. *Genome Biology* 15:R34.
- 787 Huelsenbeck JP, Crandall KA. 1997. Phylogeny Estimation and Hypothesis Testing Using Maximum  
788 Likelihood. *Annual Review of Ecology and Systematics* 28:437-466.
- 789 Jordan G, Goldman N. 2012. The effects of alignment error and alignment filtering on the sitewise  
790 detection of positive selection. *Mol Biol Evol* 29:1125-1139.
- 791 Jukes TH, Cantor CR. 1969. CHAPTER 24 - Evolution of Protein Molecules. In: Munro HN, editor.  
792 *Mammalian Protein Metabolism*: Academic Press. p. 21-132.
- 793 Kar S, Deb M, Sengupta D, Shilpi A, Parbin S, Torrisani J, Pradhan S, Patra S. 2012. An insight into the  
794 various regulatory mechanisms modulating human DNA methyltransferase 1 stability and function.  
795 *Epigenetics* 7:994-1007.
- 796 Karolchik D, Hinrichs AS, Furey TS, Roskin KM, Sugnet CW, Haussler D, Kent WJ. 2004. The UCSC Table  
797 Browser data retrieval tool. *Nucleic Acids Res* 32:D493-496.
- 798 Kent WJ, Zweig AS, Barber G, Hinrichs AS, Karolchik D. 2010. BigWig and BigBed: enabling browsing of  
799 large distributed datasets. *Bioinformatics* 26:2204-2207.
- 800 Kim M, Costello J. 2017. DNA methylation: an epigenetic mark of cellular memory. *Experimental &*  
801 *molecular medicine* 49:e322-e322.
- 802 Kim S-H, Elango N, Warden C, Vigoda E, Yi SV. 2006. Heterogeneous Genomic Molecular Clocks in  
803 Primates. *PLOS Genetics* 2:e163.
- 804 Kimura M. 1980. A simple method for estimating evolutionary rates of base substitutions through  
805 comparative studies of nucleotide sequences. *J Mol Evol* 16:111-120.
- 806 Kishino H, Miyata T, Hasegawa M. 1990. Maximum likelihood inference of protein phylogeny and the  
807 origin of chloroplasts. *Journal of Molecular Evolution* 31:151-160.
- 808 Kolaczkowski B, Thornton JW. 2004. Performance of maximum parsimony and likelihood phylogenetics  
809 when evolution is heterogeneous. *Nature* 431:980-984.
- 810 Kosiol C, Vinar T, da Fonseca RR, Hubisz MJ, Bustamante CD, Nielsen R, Siepel A. 2008. Patterns of  
811 positive selection in six Mammalian genomes. *PLoS Genet* 4:e1000144.
- 812 Kuhner MK, Felsenstein J. 1994. A simulation comparison of phylogeny algorithms under equal and  
813 unequal evolutionary rates. *Mol Biol Evol* 11:459-468.
- 814 Larkin MA, Blackshields G, Brown NP, Chenna R, McGettigan PA, McWilliam H, Valentin F, Wallace IM,  
815 Wilm A, Lopez R, et al. 2007. Clustal W and Clustal X version 2.0. *Bioinformatics* 23:2947-2948.

816 Leonhardt H, Page AW, Weier HU, Bestor TH. 1992. A targeting sequence directs DNA methyltransferase  
817 to sites of DNA replication in mammalian nuclei. *Cell* 71:865-873.

818 Li H, Handsaker B, Wysoker A, Fennell T, Ruan J, Homer N, Marth G, Abecasis G, Durbin R, Genome  
819 Project Data Processing S. 2009. The Sequence Alignment/Map format and SAMtools. *Bioinformatics*  
820 (Oxford, England) 25:2078-2079.

821 Liberzon A, Birger C, Thorvaldsdottir H, Ghandi M, Mesirov JP, Tamayo P. 2015. The Molecular  
822 Signatures Database (MSigDB) hallmark gene set collection. *Cell Syst* 1:417-425.

823 Lind MI, Spagopoulou F. 2018. Evolutionary consequences of epigenetic inheritance. *Heredity* (Edinb)  
824 121:205-209.

825 Locke DP, Hillier LW, Warren WC, Worley KC, Nazareth LV, Muzny DM, Yang S-P, Wang Z, Chinwalla AT,  
826 Minx P, et al. 2011. Comparative and demographic analysis of orang-utan genomes. *Nature* 469:529-  
827 533.

828 Lou DI, McBee RM, Le UQ, Stone AC, Wilkerson GK, Demogines AM, Sawyer SL. 2014. Rapid evolution of  
829 BRCA1 and BRCA2 in humans and other primates. *BMC Evolutionary Biology* 14:155.

830 Lowdon RF, Jang HS, Wang T. 2016. Evolution of Epigenetic Regulation in Vertebrate Genomes. *Trends*  
831 *Genet* 32:269-283.

832 Luo H, Gao F, Lin Y. 2015. Evolutionary conservation analysis between the essential and nonessential  
833 genes in bacterial genomes. *Scientific Reports* 5:13210.

834 Madrigal P, Alasoo K. 2018. AP-1 Takes Centre Stage in Enhancer Chromatin Dynamics. *Trends Cell Biol*  
835 28:509-511.

836 Martin DIK, Singer M, Dhahbi J, Mao G, Zhang L, Schroth GP, Pachter L, Boffelli D. 2011.  
837 Phyloepigenomic comparison of great apes reveals a correlation between somatic and germline  
838 methylation states. *Genome research* 21:2049-2057.

839 Martin M. 2011. Cutadapt removes adapter sequences from high-throughput sequencing reads.  
840 *EMBnet.journal*; Vol 17, No 1: Next Generation Sequencing Data Analysis DO - 10.14806/ej.17.1.200.

841 Mendizabal I, Shi L, Keller TE, Konopka G, Preuss TM, Hsieh T-F, Hu E, Zhang Z, Su B, Yi SV. 2016.  
842 Comparative Methylome Analyses Identify Epigenetic Regulatory Loci of Human Brain Evolution.  
843 *Molecular Biology and Evolution* 33:2947-2959.

844 Mi W, Zhang Y, Lyu J, Wang X, Tong Q, Peng D, Xue Y, Tencer AH, Wen H, Li W, et al. 2018. The ZZ-type  
845 zinc finger of ZZZ3 modulates the ATAC complex-mediated histone acetylation and gene activation.  
846 *Nature Communications* 9:3759.

847 Michalak EM, Burr ML, Bannister AJ, Dawson MA. 2019. The roles of DNA, RNA and histone methylation  
848 in ageing and cancer. *Nature Reviews Molecular Cell Biology* 20:573-589.

849 Molaro A, Hodges E, Fang F, Song Q, McCombie WR, Hannon GJ, Smith AD. 2011. Sperm methylation  
850 profiles reveal features of epigenetic inheritance and evolution in primates. *Cell* 146:1029-1041.

851 Moorjani P, Amorim CEG, Arndt PF, Przeworski M. 2016. Variation in the molecular clock of primates.  
852 *Proceedings of the National Academy of Sciences* 113:10607.

853 Pavlicek A, Noskov VN, Kouprina N, Barrett JC, Jurka J, Larionov V. 2004. Evolution of the tumor  
854 suppressor BRCA1 locus in primates: implications for cancer predisposition. *Human Molecular Genetics*  
855 13:2737-2751.

856 Pennacchio LA, Ahituv N, Moses AM, Prabhakar S, Nobrega MA, Shoukry M, Minovitsky S, Dubchak I,  
857 Holt A, Lewis KD, et al. 2006. In vivo enhancer analysis of human conserved non-coding sequences.  
858 *Nature* 444:499-502.

859 Perez MF, Lehner B. 2019. Intergenerational and transgenerational epigenetic inheritance in animals.  
860 *Nature Cell Biology* 21:143-151.

861 Qu J, Hodges E, Molaro A, Gagneux P, Dean MD, Hannon GJ, Smith AD. 2018. Evolutionary expansion of  
862 DNA hypomethylation in the mammalian germline genome. *Genome research* 28:145-158.



863 Rambaut A, Grassly NC. 1997. Seq-Gen: an application for the Monte Carlo simulation of DNA sequence  
864 evolution along phylogenetic trees. *Comput Appl Biosci* 13:235-238.

865 Reichwald K, Petzold A, Koch P, Downie BR, Hartmann N, Pietsch S, Baumgart M, Chalopin D, Felder M,  
866 Bens M, et al. 2015. Insights into Sex Chromosome Evolution and Aging from the Genome of a Short-  
867 Lived Fish. *Cell* 163:1527-1538.

868 Rosenberg MS, Kumar S. 2001. Traditional Phylogenetic Reconstruction Methods Reconstruct Shallow  
869 and Deep Evolutionary Relationships Equally Well. *Molecular Biology and Evolution* 18:1823-1827.

870 Roux J, Privman E, Moretti S, Daub JT, Robinson-Rechavi M, Keller L. 2014. Patterns of positive selection  
871 in seven ant genomes. *Mol Biol Evol* 31:1661-1685.

872 Sahm A, Bens M, Szafranski K, Holtze S, Groth M, Gorchach M, Calkhoven C, Muller C, Schwab M, Kraus J,  
873 et al. 2018. Long-lived rodents reveal signatures of positive selection in genes associated with lifespan.  
874 *PLoS Genet* 14:e1007272.

875 Saitou N, Nei M. 1987. The neighbor-joining method: a new method for reconstructing phylogenetic  
876 trees. *Mol Biol Evol* 4:406-425.

877 Saxton RA, Chantranupong L, Knockenhauer KE, Schwartz TU, Sabatini DM. 2016. Mechanism of arginine  
878 sensing by CASTOR1 upstream of mTORC1. *Nature* 536:229-233.

879 Schaefer CF, Anthony K, Krupa S, Buchoff J, Day M, Hannay T, Buetow KH. 2009. PID: the Pathway  
880 Interaction Database. *Nucleic Acids Res* 37:D674-679.

881 Shavit Grievink L, Penny D, Hendy MD, Holland BR. 2010. Phylogenetic tree reconstruction accuracy and  
882 model fit when proportions of variable sites change across the tree. *Syst Biol* 59:288-297.

883 Shultz AJ, Sackton TB. 2019. Immune genes are hotspots of shared positive selection across birds and  
884 mammals. *Elife* 8.

885 Sokal RR, Michener CD. (sokal58 co-authors). 1958. A statistical method for evaluating systematic  
886 relationships. *University of Kansas Science Bulletin* 38:1409-1438.

887 Stevens M, Cheng JB, Li D, Xie M, Hong C, Maire CL, Ligon KL, Hirst M, Marra MA, Costello JF, et al. 2013.  
888 Estimating absolute methylation levels at single-CpG resolution from methylation enrichment and  
889 restriction enzyme sequencing methods. *Genome Res* 23:1541-1553.

890 The Gene Ontology C. 2019. The Gene Ontology Resource: 20 years and still GOing strong. *Nucleic Acids*  
891 *Res* 47:D330-D338.

892 Vandamme J, Volkel P, Rosnoblet C, Le Faou P, Angrand PO. 2011. Interaction proteomics analysis of  
893 polycomb proteins defines distinct PRC1 complexes in mammalian cells. *Mol Cell Proteomics* 10:M110  
894 002642.

895 Verhoeven KJF, vonHoldt BM, Sork VL. 2016. Epigenetics in ecology and evolution: what we know  
896 and what we need to know. *Molecular Ecology* 25:1631-1638.

897 Vertino PM, Sekowski JA, Coll JM, Applegren N, Han S, Hickey RJ, Malkas LH. 2002. DNMT1 is a  
898 component of a multiprotein DNA replication complex. *Cell Cycle* 1:416-423.

899 Webb AE, Gerek ZN, Morgan CC, Walsh TA, Loscher CE, Edwards SV, O'Connell MJ. 2015. Adaptive  
900 Evolution as a Predictor of Species-Specific Innate Immune Response. *Mol Biol Evol* 32:1717-1729.

901 Xia B, Zhao D, Wang G, Zhang M, Lv J, Tomoiaga AS, Li Y, Wang X, Meng S, Cooke JP, et al. 2020. Machine  
902 learning uncovers cell identity regulator by histone code. *Nature Communications* 11:2696.

903 Xiao S, Cao X, Zhong S. 2014. Comparative epigenomics: defining and utilizing epigenomic variations  
904 across species, time-course, and individuals. *Wiley Interdiscip Rev Syst Biol Med* 6:345-352.

905 Yang X, Han H, De Carvalho Daniel D, Lay Fides D, Jones Peter A, Liang G. 2014. Gene Body Methylation  
906 Can Alter Gene Expression and Is a Therapeutic Target in Cancer. *Cancer Cell* 26:577-590.

907 Yang Z. 1997. PAML: a program package for phylogenetic analysis by maximum likelihood. *Comput Appl*  
908 *Biosci* 13:555-556.

909 Yi SV. 2017. Insights into Epigenome Evolution from Animal and Plant Methylomes. *Genome Biol Evol*  
910 9:3189-3201.

911 Yoshida R, Nei M. 2016. Efficiencies of the NJp, Maximum Likelihood, and Bayesian Methods of  
912 Phylogenetic Construction for Compositional and Noncompositional Genes. *Molecular Biology and*  
913 *Evolution* 33:1618-1624.  
914 Zaheri M, Dib L, Salamin N. 2014. A generalized mechanistic codon model. *Mol Biol Evol* 31:2528-2541.  
915 Zemach A, McDaniel IE, Silva P, Zilberman D. 2010. Genome-wide evolutionary analysis of eukaryotic  
916 DNA methylation. *Science* 328:916-919.  
917 Zeng J, Konopka G, Hunt BG, Preuss TM, Geschwind D, Yi SV. 2012. Divergent whole-genome  
918 methylation maps of human and chimpanzee brains reveal epigenetic basis of human regulatory  
919 evolution. *American journal of human genetics* 91:455-465.  
920 Zhang J, Nielsen R, Yang Z. 2005. Evaluation of an improved branch-site likelihood method for detecting  
921 positive selection at the molecular level. *Mol Biol Evol* 22:2472-2479.

922
